# Supplementary material for: Assessment of time-dependent density functionals for the electronic excitation energies of organic dyes used in DSSCs
Source: Royal Society of Chemistry journal article supplement (doi:10.1039/d2nj00210h), 2022-01-01
Supplement: d2nj00210h1.pdf [file d2nj00210h1.pdf]

# Electronic Supplementary Information (ESI) for:

## Assessment of Time-Dependent Density Functionals for the Electronic Excitation Energies of Organic Dyes Used in DSSCs

Qabas Alkhatib,<sup>a</sup> Wissam Helal,<sup>\*a</sup> and Akef T. Afaneh<sup>b</sup>

<sup>a</sup> Department of Chemistry, The University of Jordan, Amman 11942, Jordan.

<sup>b</sup> Department of Chemistry, Al-Balqa Applied University, 19117 Al-Salt, Jordan.

\* Corresponding author: wissam.helal@ju.edu.jo

### List of Tables

|           |                                                                                     |    |
|-----------|-------------------------------------------------------------------------------------|----|
| Table S1  | Vertical Excitation Energies (eV) Using GGA Functionals. . . . .                    | S4 |
| Table S2  | Vertical Excitation Energies (eV) Using GH-GGA Functionals. . .                     | S4 |
| Table S3  | Vertical Excitation Energies (eV) Using mGGA and GH-mGGA<br>Functionals. . . . .    | S5 |
| Table S4  | Vertical Excitation Energies (eV) Using RSH-GGA Functionals. . .                    | S5 |
| Table S5  | Vertical Excitation Energies (eV) Using DH-GGA and RSDH-GGA<br>Functionals. . . . . | S6 |
| Table S6  | Excited state properties calculated with the OLYP functional. . . .                 | S6 |
| Table S7  | Excited state properties calculated with the BLYP functional. . . .                 | S7 |
| Table S8  | Excited state properties calculated with the BP86 functional. . . .                 | S7 |
| Table S9  | Excited state properties calculated with the XLYP functional. . . .                 | S8 |
| Table S10 | Excited state properties calculated with the PBE functional. . . .                  | S8 |

|           |                                                                                   |     |
|-----------|-----------------------------------------------------------------------------------|-----|
| Table S11 | Excited state properties calculated with the mPWPW functional. . .                | S9  |
| Table S12 | Excited state properties calculated with the mPWLYP functional. . .               | S9  |
| Table S13 | Excited state properties calculated with the B97-D3 functional. . .               | S10 |
| Table S14 | Excited state properties calculated with the M06-L functional. . .                | S10 |
| Table S15 | Excited state properties calculated with the TPSS functional. . . .               | S11 |
| Table S16 | Excited state properties calculated with the O3LYP functional. . .                | S11 |
| Table S17 | Excited state properties calculated with the B3LYP functional. . .                | S12 |
| Table S18 | Excited state properties calculated with the B3P86 functional. . .                | S12 |
| Table S19 | Excited state properties calculated with the X3LYP functional. . .                | S13 |
| Table S20 | Excited state properties calculated with the PBE0 functional. . . .               | S13 |
| Table S21 | Excited state properties calculated with the mPW1PW functional. . .               | S14 |
| Table S22 | Excited state properties calculated with the mPW1LYP functional. . .              | S14 |
| Table S23 | Excited state properties calculated with the BH&HLYP functional. . .              | S15 |
| Table S24 | Excited state properties calculated with the TPSSh functional. . .                | S15 |
| Table S25 | Excited state properties calculated with the TPSS0 functional. . .                | S16 |
| Table S26 | Excited state properties calculated with the M06 functional. . . . .              | S16 |
| Table S27 | Excited state properties calculated with the M06-2X functional. . .               | S17 |
| Table S28 | Excited state properties calculated with the LC-BLYP functional. . .              | S17 |
| Table S29 | Excited state properties calculated with the CAM-B3LYP functional. . .            | S18 |
| Table S30 | Excited state properties calculated with the $\omega$ B97 functional. . . .       | S18 |
| Table S31 | Excited state properties calculated with the $\omega$ B97X functional. . .        | S19 |
| Table S32 | Excited state properties calculated with the $\omega$ B97X-D3 functional. . .     | S19 |
| Table S33 | Excited state properties calculated with the $\omega$ B97X-D3(BJ) functional. . . | S20 |
| Table S34 | Excited state properties calculated with the $\omega$ B97X-V functional. . .      | S20 |

|           |                                                                            |     |
|-----------|----------------------------------------------------------------------------|-----|
| Table S35 | Excited state properties calculated with the B2PLYP functional.            | S21 |
| Table S36 | Excited state properties calculated with the B2GPPLYP functional.          | S21 |
| Table S37 | Excited state properties calculated with the mPW2PLYP functional.          | S22 |
| Table S38 | Excited state properties calculated with the DSD-BLYP functional.          | S22 |
| Table S39 | Excited state properties calculated with the DSD-PBEP86 functional.        | S23 |
| Table S40 | Excited state properties calculated with the $\omega$ B2PLYP functional.   | S23 |
| Table S41 | Excited state properties calculated with the $\omega$ B2GPPLYP functional. | S24 |

## List of Figures

|           |                                                                                                                                                                         |     |
|-----------|-------------------------------------------------------------------------------------------------------------------------------------------------------------------------|-----|
| Figure S1 | Relative maximum errors (Max) of TD-DFT excitation energies.                                                                                                            | S24 |
| Figure S2 | Relative minimum errors (Min) of TD-DFT excitation energies.                                                                                                            | S25 |
| Figure S3 | Linear determination coefficients ( $R^2$ ) of TD-DFT excitation energies.                                                                                              | S25 |
| Figure S4 | Molecular orbitals (HOMO-1, HOMO, LUOM and LUMO+1) involved in the main transitions of the dye sensitizers ( <b>N1–N13</b> ). Isosurface value = 0.02.                  | S26 |
| Figure S4 | ( <i>Cont.</i> ) Molecular orbitals (HOMO-1, HOMO, LUOM and LUMO+1) involved in the main transitions of the dye sensitizers ( <b>N1–N13</b> ). Isosurface value = 0.02. | S27 |

Table S1: Vertical Excitation Energies (eV) Using GGA Functionals.

|            | OLYP   | BLYP   | BP86   | XLYP   | PBE    | mPWPW  | mPWLYP | B97-D3 | Exp   |
|------------|--------|--------|--------|--------|--------|--------|--------|--------|-------|
| <b>N1</b>  | 1.621  | 1.603  | 1.626  | 1.602  | 1.633  | 1.622  | 1.604  | 1.609  | 2.743 |
| <b>N2</b>  | 1.529  | 1.507  | 1.497  | 1.511  | 1.489  | 1.496  | 1.507  | 1.537  | 2.666 |
| <b>N3</b>  | 1.225  | 1.157  | 1.161  | 1.160  | 1.163  | 1.164  | 1.151  | 1.186  | 2.495 |
| <b>N4</b>  | 1.139  | 1.102  | 1.124  | 1.101  | 1.134  | 1.126  | 1.102  | 1.115  | 2.331 |
| <b>N5</b>  | 1.832  | 1.797  | 1.815  | 1.798  | 1.820  | 1.814  | 1.796  | 1.821  | 2.407 |
| <b>N6</b>  | 1.978  | 1.954  | 1.976  | 1.951  | 1.975  | 1.976  | 1.953  | 1.963  | 2.422 |
| <b>N7</b>  | 1.977  | 1.935  | 1.939  | 1.936  | 1.932  | 1.937  | 1.925  | 1.976  | 2.799 |
| <b>N8</b>  | 1.352  | 1.321  | 1.346  | 1.321  | 1.342  | 1.342  | 1.317  | 1.373  | 2.530 |
| <b>N9</b>  | 1.048  | 1.020  | 1.037  | 1.020  | 1.037  | 1.036  | 1.018  | 1.046  | 2.743 |
| <b>N10</b> | 1.611  | 1.578  | 1.609  | 1.576  | 1.615  | 1.607  | 1.577  | 1.603  | 2.755 |
| <b>N11</b> | 2.194  | 2.171  | 2.178  | 2.171  | 2.178  | 2.178  | 2.169  | 2.193  | 2.362 |
| <b>N12</b> | 2.116  | 2.090  | 2.106  | 2.083  | 2.107  | 2.112  | 2.090  | 2.123  | 2.300 |
| <b>N13</b> | 1.728  | 1.688  | 1.693  | 1.692  | 1.681  | 1.690  | 1.678  | 1.734  | 2.357 |
| MAE        | 0.889  | 0.922  | 0.908  | 0.922  | 0.908  | 0.908  | 0.925  | 0.895  |       |
| Max        | -0.168 | -0.191 | -0.184 | -0.191 | -0.184 | -0.184 | -0.193 | -0.169 |       |
| Min        | -1.695 | -1.723 | -1.706 | -1.723 | -1.706 | -1.707 | -1.725 | -1.697 |       |
| SD         | 0.073  | 0.070  | 0.070  | 0.070  | 0.071  | 0.072  | 0.070  | 0.070  |       |
| $R^2$      | 0.073  | 0.070  | 0.070  | 0.069  | 0.071  | 0.073  | 0.071  | 0.070  |       |

Table S2: Vertical Excitation Energies (eV) Using GH-GGA Functionals.

|            | O3LYP  | B3LYP  | B3P86  | X3LYP  | PBE0   | mPW1PW | mPW1LYP | BH&HLYP | Exp   |
|------------|--------|--------|--------|--------|--------|--------|---------|---------|-------|
| <b>N1</b>  | 0.901  | 1.262  | 1.273  | 1.346  | 1.511  | 1.514  | 1.499   | 2.483   | 2.743 |
| <b>N2</b>  | 1.429  | 1.170  | 1.173  | 1.292  | 1.521  | 1.523  | 1.508   | 2.475   | 2.666 |
| <b>N3</b>  | 1.024  | 1.375  | 1.376  | 1.452  | 1.593  | 1.596  | 1.596   | 2.594   | 2.495 |
| <b>N4</b>  | 1.606  | 1.939  | 1.945  | 2.010  | 2.136  | 2.136  | 2.133   | 2.846   | 2.331 |
| <b>N5</b>  | 2.736  | 1.066  | 1.075  | 1.140  | 1.289  | 1.290  | 1.275   | 2.340   | 2.407 |
| <b>N6</b>  | 2.173  | 1.561  | 1.536  | 1.724  | 1.981  | 1.996  | 2.018   | 2.659   | 2.422 |
| <b>N7</b>  | 1.698  | 1.377  | 1.380  | 1.472  | 1.652  | 1.653  | 1.658   | 2.903   | 2.799 |
| <b>N8</b>  | 1.950  | 1.292  | 1.287  | 1.401  | 1.594  | 1.601  | 1.604   | 2.656   | 2.530 |
| <b>N9</b>  | 1.471  | 0.843  | 0.837  | 0.958  | 1.160  | 1.172  | 1.184   | 2.590   | 2.743 |
| <b>N10</b> | 1.147  | 1.461  | 1.470  | 1.533  | 1.670  | 1.673  | 1.665   | 2.619   | 2.755 |
| <b>N11</b> | 1.024  | 0.837  | 0.842  | 0.956  | 1.182  | 1.187  | 1.186   | 2.513   | 2.362 |
| <b>N12</b> | 1.579  | 1.039  | 1.066  | 1.183  | 1.429  | 1.436  | 1.427   | 2.807   | 2.300 |
| <b>N13</b> | 0.981  | 1.296  | 1.289  | 1.361  | 1.475  | 1.481  | 1.487   | 2.533   | 2.357 |
| MAE        | 1.065  | 1.261  | 1.259  | 1.160  | 0.978  | 0.973  | 0.975   | 0.209   |       |
| Max        | 0.329  | -0.392 | -0.386 | -0.321 | -0.195 | -0.195 | -0.198  | 0.515   |       |
| Min        | -1.842 | -1.900 | -1.906 | -1.785 | -1.583 | -1.571 | -1.559  | -0.260  |       |
| SD         | 0.043  | 0.007  | 0.008  | 0.010  | 0.013  | 0.013  | 0.014   | 0.000   |       |
| $R^2$      | 0.043  | 0.007  | 0.008  | 0.010  | 0.013  | 0.013  | 0.014   | 0.000   |       |

Table S3: Vertical Excitation Energies (eV) Using mGGA and GH-mGGA Functionals.

|            | M06-L  | TPSS   | TPSSh  | TPSS0  | M060   | M06-2X | Exp   |
|------------|--------|--------|--------|--------|--------|--------|-------|
| <b>N1</b>  | 1.792  | 1.701  | 2.202  | 1.571  | 1.678  | 2.493  | 2.743 |
| <b>N2</b>  | 1.046  | 1.555  | 1.434  | 1.581  | 1.729  | 2.526  | 2.666 |
| <b>N3</b>  | 2.413  | 2.275  | 2.507  | 1.651  | 1.737  | 2.542  | 2.495 |
| <b>N4</b>  | 1.280  | 1.165  | 1.585  | 2.183  | 2.233  | 2.727  | 2.331 |
| <b>N5</b>  | 2.082  | 1.916  | 2.736  | 3.031  | 2.927  | 2.353  | 2.407 |
| <b>N6</b>  | 2.086  | 2.016  | 2.201  | 2.092  | 2.208  | 2.641  | 2.422 |
| <b>N7</b>  | 2.195  | 2.081  | 2.392  | 2.649  | 2.592  | 2.908  | 2.799 |
| <b>N8</b>  | 1.602  | 1.470  | 1.990  | 1.663  | 1.818  | 2.722  | 2.530 |
| <b>N9</b>  | 1.207  | 1.109  | 1.491  | 1.256  | 1.458  | 2.597  | 2.743 |
| <b>N10</b> | 1.844  | 1.701  | 1.189  | 1.748  | 1.753  | 2.551  | 2.755 |
| <b>N11</b> | 2.323  | 2.241  | 1.028  | 1.261  | 1.452  | 2.475  | 2.362 |
| <b>N12</b> | 0.997  | 1.964  | 1.568  | 1.512  | 1.659  | 2.741  | 2.300 |
| <b>N13</b> | 2.061  | 1.885  | 1.029  | 1.571  | 1.510  | 2.438  | 2.357 |
| MAE        | 0.768  | 0.756  | 0.788  | 0.799  | 0.707  | 0.184  |       |
| Max        | -0.039 | -0.121 | 0.329  | 0.624  | 0.520  | 0.441  |       |
| Min        | -1.620 | -1.634 | -1.566 | -1.487 | -1.285 | -0.250 |       |
| SD         | 0.002  | 0.060  | 0.017  | 0.001  | 0.001  | 0.030  |       |
| $R^2$      | 0.002  | 0.060  | 0.017  | 0.001  | 0.001  | 0.029  |       |

Table S4: Vertical Excitation Energies (eV) Using RSH-GGA Functionals.

|            | LC-BLYP | CAM-B3LYP | $\omega$ B97 | $\omega$ B97X | $\omega$ B97X-D3 | $\omega$ B97X-D3(BJ) | $\omega$ B97X-V | Exp   |
|------------|---------|-----------|--------------|---------------|------------------|----------------------|-----------------|-------|
| <b>N1</b>  | 2.853   | 2.559     | 2.961        | 2.889         | 2.828            | 2.908                | 2.908           | 2.743 |
| <b>N2</b>  | 2.822   | 2.566     | 2.914        | 2.842         | 2.782            | 2.860                | 2.860           | 2.666 |
| <b>N3</b>  | 2.957   | 2.633     | 3.089        | 3.007         | 2.931            | 3.033                | 3.033           | 2.495 |
| <b>N4</b>  | 2.971   | 2.786     | 3.162        | 3.065         | 2.986            | 3.093                | 3.093           | 2.331 |
| <b>N5</b>  | 3.115   | 2.471     | 3.294        | 3.189         | 3.064            | 3.217                | 3.217           | 2.407 |
| <b>N6</b>  | 2.826   | 2.654     | 2.936        | 2.864         | 2.806            | 2.885                | 2.885           | 2.422 |
| <b>N7</b>  | 3.079   | 2.910     | 3.180        | 3.112         | 3.058            | 3.133                | 3.133           | 2.799 |
| <b>N8</b>  | 3.064   | 2.737     | 3.191        | 3.090         | 3.003            | 3.108                | 3.108           | 2.530 |
| <b>N9</b>  | 2.928   | 2.657     | 3.034        | 2.955         | 2.885            | 2.976                | 2.976           | 2.743 |
| <b>N10</b> | 3.002   | 2.651     | 3.148        | 3.064         | 2.983            | 3.087                | 3.087           | 2.755 |
| <b>N11</b> | 2.693   | 2.535     | 2.793        | 2.737         | 2.688            | 2.761                | 2.761           | 2.362 |
| <b>N12</b> | 2.971   | 2.789     | 3.146        | 3.058         | 2.984            | 3.088                | 3.088           | 2.300 |
| <b>N13</b> | 3.140   | 2.587     | 3.379        | 3.228         | 3.086            | 3.253                | 3.253           | 2.357 |
| MAE        | 0.424   | 0.198     | 0.563        | 0.476         | 0.398            | 0.499                | 0.499           |       |
| Max        | 0.783   | 0.489     | 1.022        | 0.871         | 0.729            | 0.896                | 0.896           |       |
| Min        | 0.110   | -0.184    | 0.218        | 0.146         | 0.085            | 0.165                | 0.165           |       |
| SD         | 0.227   | 0.134     | 0.266        | 0.248         | 0.229            | 0.251                | 0.251           |       |
| $R^2$      | 0.000   | 0.016     | 0.029        | 0.016         | 0.004            | 0.021                | 0.021           |       |

Table S5: Vertical Excitation Energies (eV) Using DH-GGA and RSDH-GGA Functionals.

|            | B2PLYP | B2GPPLYP | mPW2PLYP | DSDBLYP | DSDPBEP86 | $\omega$ B2PLYP | $\omega$ B2GPPLYP | Exp   |
|------------|--------|----------|----------|---------|-----------|-----------------|-------------------|-------|
| <b>N1</b>  | 2.192  | 2.463    | 2.285    | 2.329   | 2.227     | 2.852           | 2.844             | 2.743 |
| <b>N2</b>  | 2.297  | 2.509    | 2.362    | 2.515   | 2.430     | 2.833           | 2.834             | 2.666 |
| <b>N3</b>  | 2.205  | 2.524    | 2.319    | 2.291   | 2.152     | 2.968           | 2.956             | 2.495 |
| <b>N4</b>  | 2.369  | 2.566    | 2.468    | 1.987   | 1.853     | 2.987           | 2.968             | 2.331 |
| <b>N5</b>  | 1.739  | 2.416    | 1.910    | 2.502   | 2.198     | 3.207           | 3.209             | 2.407 |
| <b>N6</b>  | 2.401  | 2.523    | 2.456    | 2.269   | 2.194     | 2.803           | 2.787             | 2.422 |
| <b>N7</b>  | 2.743  | 2.874    | 2.787    | 2.811   | 2.749     | 3.107           | 3.108             | 2.799 |
| <b>N8</b>  | 2.432  | 2.696    | 2.513    | 2.674   | 2.569     | 3.100           | 3.102             | 2.530 |
| <b>N9</b>  | 2.362  | 2.627    | 2.446    | 2.595   | 2.490     | 2.970           | 2.975             | 2.743 |
| <b>N10</b> | 2.210  | 2.531    | 2.327    | 2.226   | 2.081     | 3.020           | 3.008             | 2.755 |
| <b>N11</b> | 2.240  | 2.417    | 2.313    | 2.153   | 2.070     | 2.695           | 2.682             | 2.362 |
| <b>N12</b> | 2.287  | 2.490    | 2.393    | 2.008   | 1.750     | 2.963           | 2.994             | 2.300 |
| <b>N13</b> | 1.906  | 2.355    | 2.067    | 1.798   | 1.544     | 3.158           | 3.133             | 2.357 |
| MAE        | 0.277  | 0.126    | 0.215    | 0.250   | 0.360     | 0.443           | 0.438             |       |
| Max        | 0.038  | 0.235    | 0.137    | 0.144   | 0.039     | 0.801           | 0.802             |       |
| Min        | -0.668 | -0.280   | -0.497   | -0.559  | -0.813    | 0.109           | 0.101             |       |
| SD         | 0.232  | 0.091    | 0.175    | 0.167   | 0.233     | 0.236           | 0.236             |       |
| $R^2$      | 0.163  | 0.293    | 0.158    | 0.452   | 0.506     | 0.000           | 0.000             |       |

Table S6: Excited state properties calculated with the OLYP functional.

| Compound   | Electronic transition | $\lambda_{\max}$ (nm) | Optical gap (eV) | Oscillator strength | MO designation (coefficient)  | Nature                  |
|------------|-----------------------|-----------------------|------------------|---------------------|-------------------------------|-------------------------|
| <b>N1</b>  | $S_0 \rightarrow S_3$ | 764.7                 | 1.621            | 0.290               | H-1 $\rightarrow$ L (0.434)   | $\pi \rightarrow \pi^*$ |
| <b>N2</b>  | $S_0 \rightarrow S_3$ | 810.8                 | 1.529            | 0.711               | H-1 $\rightarrow$ L (0.849)   | $\pi \rightarrow \pi^*$ |
| <b>N3</b>  | $S_0 \rightarrow S_2$ | 1012.4                | 1.225            | 0.031               | H $\rightarrow$ L (0.921)     | $\pi \rightarrow \pi^*$ |
| <b>N4</b>  | $S_0 \rightarrow S_1$ | 1088.1                | 1.139            | 0.341               | H $\rightarrow$ L (0.869)     | $\pi \rightarrow \pi^*$ |
| <b>N5</b>  | $S_0 \rightarrow S_4$ | 676.9                 | 1.832            | 0.101               | H-3 $\rightarrow$ L (0.779)   | $\pi \rightarrow \pi^*$ |
| <b>N6</b>  | $S_0 \rightarrow S_2$ | 626.8                 | 1.978            | 0.478               | H-1 $\rightarrow$ L (0.800)   | $\pi \rightarrow \pi^*$ |
| <b>N7</b>  | $S_0 \rightarrow S_4$ | 627.2                 | 1.977            | 0.873               | H-1 $\rightarrow$ L (0.767)   | $\pi \rightarrow \pi^*$ |
| <b>N8</b>  | $S_0 \rightarrow S_3$ | 916.9                 | 1.352            | 0.358               | H-1 $\rightarrow$ L (0.902)   | $\pi \rightarrow \pi^*$ |
| <b>N9</b>  | $S_0 \rightarrow S_3$ | 1182.5                | 1.048            | 0.280               | H-1 $\rightarrow$ L (0.901)   | $\pi \rightarrow \pi^*$ |
| <b>N10</b> | $S_0 \rightarrow S_3$ | 769.4                 | 1.611            | 0.117               | H-3 $\rightarrow$ L (0.603)   | $\pi \rightarrow \pi^*$ |
| <b>N11</b> | $S_0 \rightarrow S_5$ | 565.0                 | 2.194            | 0.784               | H-1 $\rightarrow$ L+1 (0.551) | $\pi \rightarrow \pi^*$ |
| <b>N12</b> | $S_0 \rightarrow S_7$ | 585.8                 | 2.116            | 0.195               | H-2 $\rightarrow$ L (0.441)   | $\pi \rightarrow \pi^*$ |
| <b>N13</b> | $S_0 \rightarrow S_4$ | 717.3                 | 1.728            | 0.128               | H-1 $\rightarrow$ L (0.870)   | $\pi \rightarrow \pi^*$ |

Table S7: Excited state properties calculated with the BLYP functional.

| Compound   | Electronic transition | $\lambda_{\max}$ (nm) | Optical gap (eV) | Oscillator strength | MO designation (coefficient)  | Nature                  |
|------------|-----------------------|-----------------------|------------------|---------------------|-------------------------------|-------------------------|
| <b>N1</b>  | $S_0 \rightarrow S_3$ | 773.6                 | 1.603            | 0.290               | H-1 $\rightarrow$ L (0.429)   | $\pi \rightarrow \pi^*$ |
| <b>N2</b>  | $S_0 \rightarrow S_3$ | 822.8                 | 1.507            | 0.708               | H $\rightarrow$ L (0.844)     | $\pi \rightarrow \pi^*$ |
| <b>N3</b>  | $S_0 \rightarrow S_2$ | 1071.2                | 1.157            | 0.026               | H $\rightarrow$ L (0.937)     | $\pi \rightarrow \pi^*$ |
| <b>N4</b>  | $S_0 \rightarrow S_1$ | 1125.5                | 1.102            | 0.323               | H $\rightarrow$ L (0.866)     | $\pi \rightarrow \pi^*$ |
| <b>N5</b>  | $S_0 \rightarrow S_4$ | 690.1                 | 1.797            | 0.095               | H-3 $\rightarrow$ L (0.785)   | $\pi \rightarrow \pi^*$ |
| <b>N6</b>  | $S_0 \rightarrow S_2$ | 634.6                 | 1.954            | 0.460               | H-1 $\rightarrow$ L (0.768)   | $\pi \rightarrow \pi^*$ |
| <b>N7</b>  | $S_0 \rightarrow S_4$ | 640.8                 | 1.935            | 0.845               | H-1 $\rightarrow$ L (0.757)   | $\pi \rightarrow \pi^*$ |
| <b>N8</b>  | $S_0 \rightarrow S_3$ | 938.6                 | 1.321            | 0.351               | H-1 $\rightarrow$ L (0.903)   | $\pi \rightarrow \pi^*$ |
| <b>N9</b>  | $S_0 \rightarrow S_3$ | 1215.2                | 1.020            | 0.270               | H-1 $\rightarrow$ L (0.897)   | $\pi \rightarrow \pi^*$ |
| <b>N10</b> | $S_0 \rightarrow S_3$ | 785.7                 | 1.578            | 0.119               | H-3 $\rightarrow$ L (0.593)   | $\pi \rightarrow \pi^*$ |
| <b>N11</b> | $S_0 \rightarrow S_5$ | 571.0                 | 2.171            | 0.769               | H-1 $\rightarrow$ L+1 (0.547) | $\pi \rightarrow \pi^*$ |
| <b>N12</b> | $S_0 \rightarrow S_7$ | 593.4                 | 2.090            | 0.187               | H-2 $\rightarrow$ L (0.433)   | $\pi \rightarrow \pi^*$ |
| <b>N13</b> | $S_0 \rightarrow S_4$ | 734.6                 | 1.688            | 0.123               | H-1 $\rightarrow$ L (0.870)   | $\pi \rightarrow \pi^*$ |

Table S8: Excited state properties calculated with the BP86 functional.

| Compound   | Electronic transition | $\lambda_{\max}$ (nm) | Optical gap (eV) | Oscillator strength | MO designation (coefficient)  | Nature                  |
|------------|-----------------------|-----------------------|------------------|---------------------|-------------------------------|-------------------------|
| <b>N1</b>  | $S_0 \rightarrow S_3$ | 762.4                 | 1.626            | 0.294               | H-1 $\rightarrow$ L (0.423)   | $\pi \rightarrow \pi^*$ |
| <b>N2</b>  | $S_0 \rightarrow S_3$ | 828.0                 | 1.497            | 0.683               | H $\rightarrow$ L (0.851)     | $\pi \rightarrow \pi^*$ |
| <b>N3</b>  | $S_0 \rightarrow S_2$ | 1068.3                | 1.161            | 0.024               | H $\rightarrow$ L (0.934)     | $\pi \rightarrow \pi^*$ |
| <b>N4</b>  | $S_0 \rightarrow S_1$ | 1103.3                | 1.124            | 0.342               | H $\rightarrow$ L (0.866)     | $\pi \rightarrow \pi^*$ |
| <b>N5</b>  | $S_0 \rightarrow S_4$ | 683.0                 | 1.815            | 0.097               | H-3 $\rightarrow$ L (0.784)   | $\pi \rightarrow \pi^*$ |
| <b>N6</b>  | $S_0 \rightarrow S_2$ | 627.6                 | 1.976            | 0.444               | H-1 $\rightarrow$ L (0.728)   | $\pi \rightarrow \pi^*$ |
| <b>N7</b>  | $S_0 \rightarrow S_4$ | 639.3                 | 1.939            | 0.839               | H-1 $\rightarrow$ L (0.756)   | $\pi \rightarrow \pi^*$ |
| <b>N8</b>  | $S_0 \rightarrow S_3$ | 920.9                 | 1.346            | 0.361               | H-1 $\rightarrow$ L (0.903)   | $\pi \rightarrow \pi^*$ |
| <b>N9</b>  | $S_0 \rightarrow S_3$ | 1195.7                | 1.037            | 0.281               | H-1 $\rightarrow$ L (0.901)   | $\pi \rightarrow \pi^*$ |
| <b>N10</b> | $S_0 \rightarrow S_3$ | 770.4                 | 1.609            | 0.126               | H-3 $\rightarrow$ L (0.587)   | $\pi \rightarrow \pi^*$ |
| <b>N11</b> | $S_0 \rightarrow S_5$ | 569.2                 | 2.178            | 0.790               | H-1 $\rightarrow$ L+1 (0.564) | $\pi \rightarrow \pi^*$ |
| <b>N12</b> | $S_0 \rightarrow S_7$ | 588.9                 | 2.106            | 0.147               | H-2 $\rightarrow$ L (0.392)   | $\pi \rightarrow \pi^*$ |
| <b>N13</b> | $S_0 \rightarrow S_4$ | 732.4                 | 1.693            | 0.124               | H-1 $\rightarrow$ L (0.864)   | $\pi \rightarrow \pi^*$ |

Table S9: Excited state properties calculated with the XLYP functional.

| Compound   | Electronic transition | $\lambda_{\max}$ (nm) | Optical gap (eV) | Oscillator strength | MO designation (coefficient)  | Nature                  |
|------------|-----------------------|-----------------------|------------------|---------------------|-------------------------------|-------------------------|
| <b>N1</b>  | $S_0 \rightarrow S_3$ | 773.9                 | 1.602            | 0.291               | H-1 $\rightarrow$ L (0.430)   | $\pi \rightarrow \pi^*$ |
| <b>N2</b>  | $S_0 \rightarrow S_3$ | 820.3                 | 1.511            | 0.715               | H $\rightarrow$ L (0.843)     | $\pi \rightarrow \pi^*$ |
| <b>N3</b>  | $S_0 \rightarrow S_2$ | 1069.0                | 1.160            | 0.026               | H $\rightarrow$ L (0.937)     | $\pi \rightarrow \pi^*$ |
| <b>N4</b>  | $S_0 \rightarrow S_1$ | 1126.5                | 1.101            | 0.320               | H $\rightarrow$ L (0.866)     | $\pi \rightarrow \pi^*$ |
| <b>N5</b>  | $S_0 \rightarrow S_4$ | 689.7                 | 1.798            | 0.096               | H-3 $\rightarrow$ L (0.784)   | $\pi \rightarrow \pi^*$ |
| <b>N6</b>  | $S_0 \rightarrow S_2$ | 635.5                 | 1.951            | 0.462               | H-1 $\rightarrow$ L (0.775)   | $\pi \rightarrow \pi^*$ |
| <b>N7</b>  | $S_0 \rightarrow S_4$ | 640.5                 | 1.936            | 0.846               | H-1 $\rightarrow$ L (0.757)   | $\pi \rightarrow \pi^*$ |
| <b>N8</b>  | $S_0 \rightarrow S_3$ | 938.8                 | 1.321            | 0.351               | H-1 $\rightarrow$ L (0.903)   | $\pi \rightarrow \pi^*$ |
| <b>N9</b>  | $S_0 \rightarrow S_3$ | 1216.0                | 1.020            | 0.269               | H-1 $\rightarrow$ L (0.896)   | $\pi \rightarrow \pi^*$ |
| <b>N10</b> | $S_0 \rightarrow S_3$ | 786.7                 | 1.576            | 0.118               | H-3 $\rightarrow$ L (0.597)   | $\pi \rightarrow \pi^*$ |
| <b>N11</b> | $S_0 \rightarrow S_5$ | 571.0                 | 2.171            | 0.769               | H-1 $\rightarrow$ L+1 (0.547) | $\pi \rightarrow \pi^*$ |
| <b>N12</b> | $S_0 \rightarrow S_7$ | 595.1                 | 2.083            | 0.190               | H-2 $\rightarrow$ L (0.435)   | $\pi \rightarrow \pi^*$ |
| <b>N13</b> | $S_0 \rightarrow S_4$ | 732.8                 | 1.692            | 0.123               | H-1 $\rightarrow$ L (0.870)   | $\pi \rightarrow \pi^*$ |

Table S10: Excited state properties calculated with the PBE functional.

| Compound   | Electronic transition | $\lambda_{\max}$ (nm) | Optical gap (eV) | Oscillator strength | MO designation (coefficient)  | Nature                  |
|------------|-----------------------|-----------------------|------------------|---------------------|-------------------------------|-------------------------|
| <b>N1</b>  | $S_0 \rightarrow S_3$ | 759.1                 | 1.633            | 0.295               | H-1 $\rightarrow$ L (0.420)   | $\pi \rightarrow \pi^*$ |
| <b>N2</b>  | $S_0 \rightarrow S_3$ | 832.5                 | 1.489            | 0.668               | H $\rightarrow$ L (0.853)     | $\pi \rightarrow \pi^*$ |
| <b>N3</b>  | $S_0 \rightarrow S_2$ | 1066.4                | 1.163            | 0.024               | H $\rightarrow$ L (0.933)     | $\pi \rightarrow \pi^*$ |
| <b>N4</b>  | $S_0 \rightarrow S_1$ | 1093.4                | 1.134            | 0.349               | H $\rightarrow$ L (0.865)     | $\pi \rightarrow \pi^*$ |
| <b>N5</b>  | $S_0 \rightarrow S_4$ | 681.3                 | 1.820            | 0.097               | H-3 $\rightarrow$ L (0.783)   | $\pi \rightarrow \pi^*$ |
| <b>N6</b>  | $S_0 \rightarrow S_2$ | 627.7                 | 1.975            | 0.423               | H-1 $\rightarrow$ L (0.683)   | $\pi \rightarrow \pi^*$ |
| <b>N7</b>  | $S_0 \rightarrow S_4$ | 641.8                 | 1.932            | 0.825               | H-1 $\rightarrow$ L (0.753)   | $\pi \rightarrow \pi^*$ |
| <b>N8</b>  | $S_0 \rightarrow S_3$ | 924.1                 | 1.342            | 0.358               | H-1 $\rightarrow$ L (0.903)   | $\pi \rightarrow \pi^*$ |
| <b>N9</b>  | $S_0 \rightarrow S_3$ | 1195.4                | 1.037            | 0.281               | H-1 $\rightarrow$ L (0.902)   | $\pi \rightarrow \pi^*$ |
| <b>N10</b> | $S_0 \rightarrow S_3$ | 767.9                 | 1.615            | 0.130               | H-3 $\rightarrow$ L (0.577)   | $\pi \rightarrow \pi^*$ |
| <b>N11</b> | $S_0 \rightarrow S_5$ | 569.4                 | 2.178            | 0.787               | H-1 $\rightarrow$ L (0.563)+1 | $\pi \rightarrow \pi^*$ |
| <b>N12</b> | $S_0 \rightarrow S_7$ | 588.4                 | 2.107            | 0.149               | H-2 $\rightarrow$ L (0.394)   | $\pi \rightarrow \pi^*$ |
| <b>N13</b> | $S_0 \rightarrow S_4$ | 737.5                 | 1.681            | 0.121               | H-1 $\rightarrow$ L (0.866)   | $\pi \rightarrow \pi^*$ |



Table S11: Excited state properties calculated with the mPWPW functional.

| Compound   | Electronic transition | $\lambda_{\max}$ (nm) | Optical gap (eV) | Oscillator strength | MO designation (coefficient)  | Nature                  |
|------------|-----------------------|-----------------------|------------------|---------------------|-------------------------------|-------------------------|
| <b>N1</b>  | $S_0 \rightarrow S_3$ | 764.4                 | 1.622            | 0.290               | H-1 $\rightarrow$ L (0.422)   | $\pi \rightarrow \pi^*$ |
| <b>N2</b>  | $S_0 \rightarrow S_3$ | 828.7                 | 1.496            | 0.679               | H $\rightarrow$ L (0.851)     | $\pi \rightarrow \pi^*$ |
| <b>N3</b>  | $S_0 \rightarrow S_2$ | 1065.3                | 1.164            | 0.024               | H $\rightarrow$ L (0.933)     | $\pi \rightarrow \pi^*$ |
| <b>N4</b>  | $S_0 \rightarrow S_1$ | 1101.4                | 1.126            | 0.343               | H $\rightarrow$ L (0.866)     | $\pi \rightarrow \pi^*$ |
| <b>N5</b>  | $S_0 \rightarrow S_4$ | 683.3                 | 1.814            | 0.096               | H-3 $\rightarrow$ L (0.784)   | $\pi \rightarrow \pi^*$ |
| <b>N6</b>  | $S_0 \rightarrow S_2$ | 627.6                 | 1.976            | 0.447               | H-1 $\rightarrow$ L (0.733)   | $\pi \rightarrow \pi^*$ |
| <b>N7</b>  | $S_0 \rightarrow S_4$ | 640.2                 | 1.937            | 0.834               | H-1 $\rightarrow$ L (0.755)   | $\pi \rightarrow \pi^*$ |
| <b>N8</b>  | $S_0 \rightarrow S_3$ | 923.6                 | 1.342            | 0.358               | H-1 $\rightarrow$ L (0.903)   | $\pi \rightarrow \pi^*$ |
| <b>N9</b>  | $S_0 \rightarrow S_3$ | 1196.9                | 1.036            | 0.279               | H-1 $\rightarrow$ L (0.901)   | $\pi \rightarrow \pi^*$ |
| <b>N10</b> | $S_0 \rightarrow S_3$ | 771.4                 | 1.607            | 0.126               | H-3 $\rightarrow$ L (0.583)   | $\pi \rightarrow \pi^*$ |
| <b>N11</b> | $S_0 \rightarrow S_5$ | 569.3                 | 2.178            | 0.785               | H-1 $\rightarrow$ L+1 (0.557) | $\pi \rightarrow \pi^*$ |
| <b>N12</b> | $S_0 \rightarrow S_7$ | 587.1                 | 2.112            | 0.159               | H-2 $\rightarrow$ L (0.404)   | $\pi \rightarrow \pi^*$ |
| <b>N13</b> | $S_0 \rightarrow S_4$ | 733.7                 | 1.690            | 0.122               | H-1 $\rightarrow$ L (0.867)   | $\pi \rightarrow \pi^*$ |

Table S12: Excited state properties calculated with the mPWLYP functional.

| Compound   | Electronic transition | $\lambda_{\max}$ (nm) | Optical gap (eV) | Oscillator strength | MO designation (coefficient)  | Nature                  |
|------------|-----------------------|-----------------------|------------------|---------------------|-------------------------------|-------------------------|
| <b>N1</b>  | $S_0 \rightarrow S_3$ | 772.9                 | 1.604            | 0.292               | H-1 $\rightarrow$ L (0.428)   | $\pi \rightarrow \pi^*$ |
| <b>N2</b>  | $S_0 \rightarrow S_3$ | 822.7                 | 1.507            | 0.710               | H $\rightarrow$ L (0.844)     | $\pi \rightarrow \pi^*$ |
| <b>N3</b>  | $S_0 \rightarrow S_2$ | 1076.7                | 1.151            | 0.025               | H $\rightarrow$ L (0.938)     | $\pi \rightarrow \pi^*$ |
| <b>N4</b>  | $S_0 \rightarrow S_1$ | 1125.0                | 1.102            | 0.323               | H $\rightarrow$ L (0.865)     | $\pi \rightarrow \pi^*$ |
| <b>N5</b>  | $S_0 \rightarrow S_4$ | 690.3                 | 1.796            | 0.095               | H-3 $\rightarrow$ L (0.785)   | $\pi \rightarrow \pi^*$ |
| <b>N6</b>  | $S_0 \rightarrow S_2$ | 634.7                 | 1.953            | 0.455               | H-1 $\rightarrow$ L (0.758)   | $\pi \rightarrow \pi^*$ |
| <b>N7</b>  | $S_0 \rightarrow S_4$ | 644.2                 | 1.925            | 0.834               | H-1 $\rightarrow$ L (0.754)   | $\pi \rightarrow \pi^*$ |
| <b>N8</b>  | $S_0 \rightarrow S_3$ | 941.1                 | 1.317            | 0.351               | H-1 $\rightarrow$ L (0.903)   | $\pi \rightarrow \pi^*$ |
| <b>N9</b>  | $S_0 \rightarrow S_3$ | 1218.0                | 1.018            | 0.269               | H-1 $\rightarrow$ L (0.897)   | $\pi \rightarrow \pi^*$ |
| <b>N10</b> | $S_0 \rightarrow S_3$ | 786.4                 | 1.577            | 0.120               | H-3 $\rightarrow$ L (0.590)   | $\pi \rightarrow \pi^*$ |
| <b>N11</b> | $S_0 \rightarrow S_5$ | 571.5                 | 2.169            | 0.769               | H-1 $\rightarrow$ L+1 (0.547) | $\pi \rightarrow \pi^*$ |
| <b>N12</b> | $S_0 \rightarrow S_7$ | 593.2                 | 2.090            | 0.182               | H-2 $\rightarrow$ L (0.425)   | $\pi \rightarrow \pi^*$ |
| <b>N13</b> | $S_0 \rightarrow S_4$ | 738.7                 | 1.678            | 0.121               | H-1 $\rightarrow$ L (0.870)   | $\pi \rightarrow \pi^*$ |

Table S13: Excited state properties calculated with the B97-D3 functional.

| Compound   | Electronic transition | $\lambda_{\max}$ (nm) | Optical gap (eV) | Oscillator strength | MO designation (coefficient)  | Nature                  |
|------------|-----------------------|-----------------------|------------------|---------------------|-------------------------------|-------------------------|
| <b>N1</b>  | $S_0 \rightarrow S_3$ | 770.4                 | 1.609            | 0.288               | H-1 $\rightarrow$ L (0.438)   | $\pi \rightarrow \pi^*$ |
| <b>N2</b>  | $S_0 \rightarrow S_3$ | 806.7                 | 1.537            | 0.732               | H $\rightarrow$ L (0.845)     | $\pi \rightarrow \pi^*$ |
| <b>N3</b>  | $S_0 \rightarrow S_2$ | 1045.2                | 1.186            | 0.025               | H $\rightarrow$ L (0.934)     | $\pi \rightarrow \pi^*$ |
| <b>N4</b>  | $S_0 \rightarrow S_1$ | 1111.7                | 1.115            | 0.323               | H $\rightarrow$ L (0.870)     | $\pi \rightarrow \pi^*$ |
| <b>N5</b>  | $S_0 \rightarrow S_4$ | 680.8                 | 1.821            | 0.099               | H-3 $\rightarrow$ L (0.782)   | $\pi \rightarrow \pi^*$ |
| <b>N6</b>  | $S_0 \rightarrow S_2$ | 631.6                 | 1.963            | 0.479               | H-1 $\rightarrow$ L (0.812)   | $\pi \rightarrow \pi^*$ |
| <b>N7</b>  | $S_0 \rightarrow S_4$ | 627.5                 | 1.976            | 0.883               | H-1 $\rightarrow$ L (0.767)   | $\pi \rightarrow \pi^*$ |
| <b>N8</b>  | $S_0 \rightarrow S_3$ | 903.3                 | 1.373            | 0.367               | H-1 $\rightarrow$ L (0.904)   | $\pi \rightarrow \pi^*$ |
| <b>N9</b>  | $S_0 \rightarrow S_3$ | 1185.5                | 1.046            | 0.275               | H-1 $\rightarrow$ L (0.896)   | $\pi \rightarrow \pi^*$ |
| <b>N10</b> | $S_0 \rightarrow S_3$ | 773.2                 | 1.603            | 0.113               | H-3 $\rightarrow$ L (0.623)   | $\pi \rightarrow \pi^*$ |
| <b>N11</b> | $S_0 \rightarrow S_5$ | 565.4                 | 2.193            | 0.793               | H-1 $\rightarrow$ L+1 (0.555) | $\pi \rightarrow \pi^*$ |
| <b>N12</b> | $S_0 \rightarrow S_7$ | 584.1                 | 2.123            | 0.165               | H-2 $\rightarrow$ L (0.404)   | $\pi \rightarrow \pi^*$ |
| <b>N13</b> | $S_0 \rightarrow S_4$ | 715.1                 | 1.734            | 0.133               | H-1 $\rightarrow$ L (0.861)   | $\pi \rightarrow \pi^*$ |

Table S14: Excited state properties calculated with the M06-L functional.

| Compound   | Electronic transition | $\lambda_{\max}$ (nm) | Optical gap (eV) | Oscillator strength | MO designation (coefficient)  | Nature                  |
|------------|-----------------------|-----------------------|------------------|---------------------|-------------------------------|-------------------------|
| <b>N1</b>  | $S_0 \rightarrow S_3$ | 691.8                 | 1.792            | 0.338               | H-1 $\rightarrow$ L (0.442)   | $\pi \rightarrow \pi^*$ |
| <b>N2</b>  | $S_0 \rightarrow S_2$ | 1185.5                | 1.046            | 0.332               | H-1 $\rightarrow$ L (0.821)   | $\pi \rightarrow \pi^*$ |
| <b>N3</b>  | $S_0 \rightarrow S_5$ | 513.9                 | 2.413            | 0.213               | H-2 $\rightarrow$ L (0.425)   | $\pi \rightarrow \pi^*$ |
| <b>N4</b>  | $S_0 \rightarrow S_1$ | 968.3                 | 1.280            | 0.381               | H $\rightarrow$ L (0.893)     | $\pi \rightarrow \pi^*$ |
| <b>N5</b>  | $S_0 \rightarrow S_4$ | 595.4                 | 2.082            | 0.195               | H-3 $\rightarrow$ L (0.690)   | $\pi \rightarrow \pi^*$ |
| <b>N6</b>  | $S_0 \rightarrow S_2$ | 594.5                 | 2.086            | 0.545               | H-1 $\rightarrow$ L (0.839)   | $\pi \rightarrow \pi^*$ |
| <b>N7</b>  | $S_0 \rightarrow S_4$ | 564.8                 | 2.195            | 1.057               | H-1 $\rightarrow$ L (0.823)   | $\pi \rightarrow \pi^*$ |
| <b>N8</b>  | $S_0 \rightarrow S_3$ | 773.9                 | 1.602            | 0.431               | H-1 $\rightarrow$ L (0.915)   | $\pi \rightarrow \pi^*$ |
| <b>N9</b>  | $S_0 \rightarrow S_3$ | 1027.4                | 1.207            | 0.309               | H-1 $\rightarrow$ L (0.896)   | $\pi \rightarrow \pi^*$ |
| <b>N10</b> | $S_0 \rightarrow S_3$ | 672.5                 | 1.844            | 0.125               | H-3 $\rightarrow$ L (0.712)   | $\pi \rightarrow \pi^*$ |
| <b>N11</b> | $S_0 \rightarrow S_5$ | 533.7                 | 2.323            | 0.857               | H-1 $\rightarrow$ L+1 (0.620) | $\pi \rightarrow \pi^*$ |
| <b>N12</b> | $S_0 \rightarrow S_3$ | 1243.9                | 0.997            | 0.138               | H-1 $\rightarrow$ L (0.849)   | $\pi \rightarrow \pi^*$ |
| <b>N13</b> | $S_0 \rightarrow S_4$ | 601.6                 | 2.061            | 0.179               | H-1 $\rightarrow$ L (0.876)   | $\pi \rightarrow \pi^*$ |

Table S15: Excited state properties calculated with the TPSS functional.

| Compound   | Electronic transition | $\lambda_{\max}$ (nm) | Optical gap (eV) | Oscillator strength | MO designation (coefficient)  | Nature                  |
|------------|-----------------------|-----------------------|------------------|---------------------|-------------------------------|-------------------------|
| <b>N1</b>  | $S_0 \rightarrow S_3$ | 728.7                 | 1.701            | 0.322               | H-1 $\rightarrow$ L (0.433)   | $\pi \rightarrow \pi^*$ |
| <b>N2</b>  | $S_0 \rightarrow S_3$ | 797.2                 | 1.555            | 0.703               | H $\rightarrow$ L (0.861)     | $\pi \rightarrow \pi^*$ |
| <b>N3</b>  | $S_0 \rightarrow S_5$ | 544.9                 | 2.275            | 0.161               | H-2 $\rightarrow$ L (0.389)   | $\pi \rightarrow \pi^*$ |
| <b>N4</b>  | $S_0 \rightarrow S_1$ | 1064.0                | 1.165            | 0.345               | H $\rightarrow$ L (0.880)     | $\pi \rightarrow \pi^*$ |
| <b>N5</b>  | $S_0 \rightarrow S_4$ | 647.0                 | 1.916            | 0.122               | H-3 $\rightarrow$ L (0.758)   | $\pi \rightarrow \pi^*$ |
| <b>N6</b>  | $S_0 \rightarrow S_2$ | 615.0                 | 2.016            | 0.504               | H-1 $\rightarrow$ L (0.835)   | $\pi \rightarrow \pi^*$ |
| <b>N7</b>  | $S_0 \rightarrow S_4$ | 595.7                 | 2.081            | 0.971               | H-1 $\rightarrow$ L (0.794)   | $\pi \rightarrow \pi^*$ |
| <b>N8</b>  | $S_0 \rightarrow S_3$ | 843.2                 | 1.470            | 0.402               | H-1 $\rightarrow$ L (0.910)   | $\pi \rightarrow \pi^*$ |
| <b>N9</b>  | $S_0 \rightarrow S_3$ | 1118.3                | 1.109            | 0.297               | H-1 $\rightarrow$ L (0.901)   | $\pi \rightarrow \pi^*$ |
| <b>N10</b> | $S_0 \rightarrow S_3$ | 729.1                 | 1.701            | 0.120               | H-3 $\rightarrow$ L (0.642)   | $\pi \rightarrow \pi^*$ |
| <b>N11</b> | $S_0 \rightarrow S_5$ | 553.3                 | 2.241            | 0.821               | H-1 $\rightarrow$ L+1 (0.590) | $\pi \rightarrow \pi^*$ |
| <b>N12</b> | $S_0 \rightarrow S_4$ | 631.4                 | 1.964            | 0.024               | H-1 $\rightarrow$ L+1 (0.847) | $\pi \rightarrow \pi^*$ |
| <b>N13</b> | $S_0 \rightarrow S_4$ | 657.7                 | 1.885            | 0.150               | H-1 $\rightarrow$ L (0.863)   | $\pi \rightarrow \pi^*$ |

Table S16: Excited state properties calculated with the O3LYP functional.

| Compound   | Electronic transition | $\lambda_{\max}$ (nm) | Optical gap (eV) | Oscillator strength | MO designation (coefficient) | Nature                  |
|------------|-----------------------|-----------------------|------------------|---------------------|------------------------------|-------------------------|
| <b>N1</b>  | $S_0 \rightarrow S_1$ | 1376.7                | 0.901            | 0.311               | H $\rightarrow$ L (0.978)    | $\pi \rightarrow \pi^*$ |
| <b>N2</b>  | $S_0 \rightarrow S_2$ | 867.5                 | 1.429            | 0.565               | H-1 $\rightarrow$ L (0.942)  | $\pi \rightarrow \pi^*$ |
| <b>N3</b>  | $S_0 \rightarrow S_1$ | 1210.5                | 1.024            | 0.324               | H $\rightarrow$ L (0.989)    | $\pi \rightarrow \pi^*$ |
| <b>N4</b>  | $S_0 \rightarrow S_1$ | 771.9                 | 1.606            | 0.616               | H $\rightarrow$ L (0.967)    | $\pi \rightarrow \pi^*$ |
| <b>N5</b>  | $S_0 \rightarrow S_4$ | 453.1                 | 2.736            | 1.084               | H-1 $\rightarrow$ L (0.704)  | $\pi \rightarrow \pi^*$ |
| <b>N6</b>  | $S_0 \rightarrow S_2$ | 570.6                 | 2.173            | 0.516               | H-1 $\rightarrow$ L (0.906)  | $\pi \rightarrow \pi^*$ |
| <b>N7</b>  | $S_0 \rightarrow S_3$ | 730.2                 | 1.698            | 0.171               | H-2 $\rightarrow$ L (0.751)  | $\pi \rightarrow \pi^*$ |
| <b>N8</b>  | $S_0 \rightarrow S_3$ | 635.9                 | 1.950            | 0.531               | H-1 $\rightarrow$ L (0.979)  | $\pi \rightarrow \pi^*$ |
| <b>N9</b>  | $S_0 \rightarrow S_2$ | 842.6                 | 1.471            | 0.486               | H-1 $\rightarrow$ L (0.943)  | $\pi \rightarrow \pi^*$ |
| <b>N10</b> | $S_0 \rightarrow S_2$ | 1081.3                | 1.147            | 0.166               | H-1 $\rightarrow$ L (0.575)  | $\pi \rightarrow \pi^*$ |
| <b>N11</b> | $S_0 \rightarrow S_2$ | 1211.0                | 1.024            | 0.179               | H $\rightarrow$ L+1 (0.979)  | $\pi \rightarrow \pi^*$ |
| <b>N12</b> | $S_0 \rightarrow S_3$ | 785.2                 | 1.579            | 0.272               | H-1 $\rightarrow$ L (0.952)  | $\pi \rightarrow \pi^*$ |
| <b>N13</b> | $S_0 \rightarrow S_1$ | 1263.3                | 0.981            | 0.200               | H $\rightarrow$ L (0.986)    | $\pi \rightarrow \pi^*$ |

Table S17: Excited state properties calculated with the B3LYP functional.

| Compound   | Electronic transition | $\lambda_{\max}$ (nm) | Optical gap (eV) | Oscillator strength | MO designation (coefficient) | Nature                  |
|------------|-----------------------|-----------------------|------------------|---------------------|------------------------------|-------------------------|
| <b>N1</b>  | $S_0 \rightarrow S_1$ | 982.2                 | 1.262            | 0.498               | H→L (0.993)                  | $\pi \rightarrow \pi^*$ |
| <b>N2</b>  | $S_0 \rightarrow S_1$ | 1060.0                | 1.170            | 0.580               | H→L (0.987)                  | $\pi \rightarrow \pi^*$ |
| <b>N3</b>  | $S_0 \rightarrow S_1$ | 901.8                 | 1.375            | 0.457               | H→L (0.984)                  | $\pi \rightarrow \pi^*$ |
| <b>N4</b>  | $S_0 \rightarrow S_1$ | 639.3                 | 1.939            | 0.842               | H→L (0.986)                  | $\pi \rightarrow \pi^*$ |
| <b>N5</b>  | $S_0 \rightarrow S_1$ | 1162.9                | 1.066            | 0.017               | H→L (0.984)                  | $\pi \rightarrow \pi^*$ |
| <b>N6</b>  | $S_0 \rightarrow S_1$ | 794.3                 | 1.561            | 0.304               | H→L (0.972)                  | $\pi \rightarrow \pi^*$ |
| <b>N7</b>  | $S_0 \rightarrow S_1$ | 900.2                 | 1.377            | 0.020               | H→L (0.928)                  | $\pi \rightarrow \pi^*$ |
| <b>N8</b>  | $S_0 \rightarrow S_1$ | 959.5                 | 1.292            | 0.269               | H→L (0.982)                  | $\pi \rightarrow \pi^*$ |
| <b>N9</b>  | $S_0 \rightarrow S_1$ | 1471.4                | 0.843            | 0.112               | H→L (0.984)                  | $\pi \rightarrow \pi^*$ |
| <b>N10</b> | $S_0 \rightarrow S_1$ | 848.4                 | 1.461            | 0.366               | H→L (0.966)                  | $\pi \rightarrow \pi^*$ |
| <b>N11</b> | $S_0 \rightarrow S_1$ | 1480.6                | 0.837            | 0.253               | H→L (0.990)                  | $\pi \rightarrow \pi^*$ |
| <b>N12</b> | $S_0 \rightarrow S_1$ | 1193.1                | 1.039            | 0.048               | H→L (0.825)                  | $\pi \rightarrow \pi^*$ |
| <b>N13</b> | $S_0 \rightarrow S_1$ | 956.8                 | 1.296            | 0.255               | H→L (0.987)                  | $\pi \rightarrow \pi^*$ |

Table S18: Excited state properties calculated with the B3P86 functional.

| Compound   | Electronic transition | $\lambda_{\max}$ (nm) | Optical gap (eV) | Oscillator strength | MO designation (coefficient) | Nature                  |
|------------|-----------------------|-----------------------|------------------|---------------------|------------------------------|-------------------------|
| <b>N1</b>  | $S_0 \rightarrow S_1$ | 974.1                 | 1.273            | 0.501               | H→L (0.993)                  | $\pi \rightarrow \pi^*$ |
| <b>N2</b>  | $S_0 \rightarrow S_1$ | 1056.8                | 1.173            | 0.572               | H→L (0.987)                  | $\pi \rightarrow \pi^*$ |
| <b>N3</b>  | $S_0 \rightarrow S_1$ | 901.1                 | 1.376            | 0.458               | H→L (0.985)                  | $\pi \rightarrow \pi^*$ |
| <b>N4</b>  | $S_0 \rightarrow S_1$ | 637.5                 | 1.945            | 0.859               | H→L (0.986)                  | $\pi \rightarrow \pi^*$ |
| <b>N5</b>  | $S_0 \rightarrow S_1$ | 1153.1                | 1.075            | 0.017               | H→L (0.984)                  | $\pi \rightarrow \pi^*$ |
| <b>N6</b>  | $S_0 \rightarrow S_1$ | 807.3                 | 1.536            | 0.288               | H→L (0.974)                  | $\pi \rightarrow \pi^*$ |
| <b>N7</b>  | $S_0 \rightarrow S_1$ | 898.3                 | 1.380            | 0.019               | H→L (0.929)                  | $\pi \rightarrow \pi^*$ |
| <b>N8</b>  | $S_0 \rightarrow S_1$ | 963.6                 | 1.287            | 0.263               | H→L (0.983)                  | $\pi \rightarrow \pi^*$ |
| <b>N9</b>  | $S_0 \rightarrow S_1$ | 1480.6                | 0.837            | 0.110               | H→L (0.984)                  | $\pi \rightarrow \pi^*$ |
| <b>N10</b> | $S_0 \rightarrow S_1$ | 843.3                 | 1.470            | 0.370               | H→L (0.964)                  | $\pi \rightarrow \pi^*$ |
| <b>N11</b> | $S_0 \rightarrow S_1$ | 1472.8                | 0.842            | 0.258               | H→L (0.990)                  | $\pi \rightarrow \pi^*$ |
| <b>N12</b> | $S_0 \rightarrow S_1$ | 1162.8                | 1.066            | 0.050               | H→L (0.804)                  | $\pi \rightarrow \pi^*$ |
| <b>N13</b> | $S_0 \rightarrow S_1$ | 961.9                 | 1.289            | 0.260               | H→L (0.987)                  | $\pi \rightarrow \pi^*$ |

Table S19: Excited state properties calculated with the X3LYP functional.

| Compound   | Electronic transition | $\lambda_{\max}$ (nm) | Optical gap (eV) | Oscillator strength | MO designation (coefficient) | Nature                  |
|------------|-----------------------|-----------------------|------------------|---------------------|------------------------------|-------------------------|
| <b>N1</b>  | $S_0 \rightarrow S_1$ | 921.3                 | 1.346            | 0.549               | H→L (0.993)                  | $\pi \rightarrow \pi^*$ |
| <b>N2</b>  | $S_0 \rightarrow S_1$ | 959.9                 | 1.292            | 0.706               | H→L (0.977)                  | $\pi \rightarrow \pi^*$ |
| <b>N3</b>  | $S_0 \rightarrow S_1$ | 854.0                 | 1.452            | 0.491               | H→L (0.981)                  | $\pi \rightarrow \pi^*$ |
| <b>N4</b>  | $S_0 \rightarrow S_1$ | 616.9                 | 2.010            | 0.897               | H→L (0.984)                  | $\pi \rightarrow \pi^*$ |
| <b>N5</b>  | $S_0 \rightarrow S_1$ | 1087.3                | 1.140            | 0.018               | H→L (0.980)                  | $\pi \rightarrow \pi^*$ |
| <b>N6</b>  | $S_0 \rightarrow S_1$ | 719.0                 | 1.724            | 0.389               | H→L (0.981)                  | $\pi \rightarrow \pi^*$ |
| <b>N7</b>  | $S_0 \rightarrow S_1$ | 842.3                 | 1.472            | 0.031               | H→L (0.916)                  | $\pi \rightarrow \pi^*$ |
| <b>N8</b>  | $S_0 \rightarrow S_1$ | 884.8                 | 1.401            | 0.311               | H→L (0.973)                  | $\pi \rightarrow \pi^*$ |
| <b>N9</b>  | $S_0 \rightarrow S_1$ | 1294.7                | 0.958            | 0.138               | H→L (0.980)                  | $\pi \rightarrow \pi^*$ |
| <b>N10</b> | $S_0 \rightarrow S_1$ | 809.0                 | 1.533            | 0.394               | H→L (0.963)                  | $\pi \rightarrow \pi^*$ |
| <b>N11</b> | $S_0 \rightarrow S_1$ | 1297.6                | 0.956            | 0.307               | H→L (0.983)                  | $\pi \rightarrow \pi^*$ |
| <b>N12</b> | $S_0 \rightarrow S_1$ | 1048.5                | 1.183            | 0.056               | H→L (0.761)                  | $\pi \rightarrow \pi^*$ |
| <b>N13</b> | $S_0 \rightarrow S_1$ | 911.2                 | 1.361            | 0.270               | H→L (0.985)                  | $\pi \rightarrow \pi^*$ |

Table S20: Excited state properties calculated with the PBE0 functional.

| Compound   | Electronic transition | $\lambda_{\max}$ (nm) | Optical gap (eV) | Oscillator strength | MO designation (coefficient) | Nature                  |
|------------|-----------------------|-----------------------|------------------|---------------------|------------------------------|-------------------------|
| <b>N1</b>  | $S_0 \rightarrow S_1$ | 820.5                 | 1.511            | 0.652               | H→L (0.989)                  | $\pi \rightarrow \pi^*$ |
| <b>N2</b>  | $S_0 \rightarrow S_1$ | 814.9                 | 1.521            | 0.958               | H→L (0.946)                  | $\pi \rightarrow \pi^*$ |
| <b>N3</b>  | $S_0 \rightarrow S_1$ | 778.5                 | 1.593            | 0.555               | H→L (0.974)                  | $\pi \rightarrow \pi^*$ |
| <b>N4</b>  | $S_0 \rightarrow S_1$ | 580.5                 | 2.136            | 1.017               | H→L (0.975)                  | $\pi \rightarrow \pi^*$ |
| <b>N5</b>  | $S_0 \rightarrow S_1$ | 962.1                 | 1.289            | 0.023               | H→L (0.973)                  | $\pi \rightarrow \pi^*$ |
| <b>N6</b>  | $S_0 \rightarrow S_1$ | 625.9                 | 1.981            | 0.539               | H→L (0.979)                  | $\pi \rightarrow \pi^*$ |
| <b>N7</b>  | $S_0 \rightarrow S_1$ | 750.6                 | 1.652            | 0.010               | H→L (0.893)                  | $\pi \rightarrow \pi^*$ |
| <b>N8</b>  | $S_0 \rightarrow S_1$ | 777.8                 | 1.594            | 0.387               | H→L (0.954)                  | $\pi \rightarrow \pi^*$ |
| <b>N9</b>  | $S_0 \rightarrow S_1$ | 1068.5                | 1.160            | 0.189               | H→L (0.968)                  | $\pi \rightarrow \pi^*$ |
| <b>N10</b> | $S_0 \rightarrow S_1$ | 742.2                 | 1.670            | 0.452               | H→L (0.958)                  | $\pi \rightarrow \pi^*$ |
| <b>N11</b> | $S_0 \rightarrow S_1$ | 1049.2                | 1.182            | 0.434               | H→L (0.963)                  | $\pi \rightarrow \pi^*$ |
| <b>N12</b> | $S_0 \rightarrow S_1$ | 867.6                 | 1.429            | 0.068               | H→L (0.633)                  | $\pi \rightarrow \pi^*$ |
| <b>N13</b> | $S_0 \rightarrow S_1$ | 840.6                 | 1.475            | 0.307               | H→L (0.982)                  | $\pi \rightarrow \pi^*$ |

Table S21: Excited state properties calculated with the mPW1PW functional.

| Compound   | Electronic transition | $\lambda_{\max}$ (nm) | Optical gap (eV) | Oscillator strength | MO designation (coefficient) | Nature                  |
|------------|-----------------------|-----------------------|------------------|---------------------|------------------------------|-------------------------|
| <b>N1</b>  | $S_0 \rightarrow S_1$ | 819.1                 | 1.514            | 0.655               | H $\rightarrow$ L (0.989)    | $\pi \rightarrow \pi^*$ |
| <b>N2</b>  | $S_0 \rightarrow S_1$ | 814.1                 | 1.523            | 0.966               | H $\rightarrow$ L (0.946)    | $\pi \rightarrow \pi^*$ |
| <b>N3</b>  | $S_0 \rightarrow S_1$ | 776.6                 | 1.596            | 0.556               | H $\rightarrow$ L (0.973)    | $\pi \rightarrow \pi^*$ |
| <b>N4</b>  | $S_0 \rightarrow S_1$ | 580.4                 | 2.136            | 1.011               | H $\rightarrow$ L (0.974)    | $\pi \rightarrow \pi^*$ |
| <b>N5</b>  | $S_0 \rightarrow S_1$ | 961.1                 | 1.290            | 0.023               | H $\rightarrow$ L (0.973)    | $\pi \rightarrow \pi^*$ |
| <b>N6</b>  | $S_0 \rightarrow S_1$ | 621.3                 | 1.996            | 0.551               | H $\rightarrow$ L (0.979)    | $\pi \rightarrow \pi^*$ |
| <b>N7</b>  | $S_0 \rightarrow S_1$ | 750.1                 | 1.653            | 0.011               | H $\rightarrow$ L (0.893)    | $\pi \rightarrow \pi^*$ |
| <b>N8</b>  | $S_0 \rightarrow S_1$ | 774.4                 | 1.601            | 0.392               | H $\rightarrow$ L (0.953)    | $\pi \rightarrow \pi^*$ |
| <b>N9</b>  | $S_0 \rightarrow S_1$ | 1057.9                | 1.172            | 0.194               | H $\rightarrow$ L (0.968)    | $\pi \rightarrow \pi^*$ |
| <b>N10</b> | $S_0 \rightarrow S_1$ | 741.1                 | 1.673            | 0.453               | H $\rightarrow$ L (0.958)    | $\pi \rightarrow \pi^*$ |
| <b>N11</b> | $S_0 \rightarrow S_1$ | 1044.3                | 1.187            | 0.436               | H $\rightarrow$ L (0.963)    | $\pi \rightarrow \pi^*$ |
| <b>N12</b> | $S_0 \rightarrow S_1$ | 863.7                 | 1.436            | 0.069               | H $\rightarrow$ L (0.637)    | $\pi \rightarrow \pi^*$ |
| <b>N13</b> | $S_0 \rightarrow S_1$ | 837.3                 | 1.481            | 0.307               | H $\rightarrow$ L (0.982)    | $\pi \rightarrow \pi^*$ |

Table S22: Excited state properties calculated with the mPW1LYP functional.

| Compound   | Electronic transition | $\lambda_{\max}$ (nm) | Optical gap (eV) | Oscillator strength | MO designation (coefficient) | Nature                  |
|------------|-----------------------|-----------------------|------------------|---------------------|------------------------------|-------------------------|
| <b>N1</b>  | $S_0 \rightarrow S_1$ | 826.8                 | 1.499            | 0.653               | H $\rightarrow$ L (0.989)    | $\pi \rightarrow \pi^*$ |
| <b>N2</b>  | $S_0 \rightarrow S_1$ | 822.0                 | 1.508            | 0.976               | H $\rightarrow$ L (0.946)    | $\pi \rightarrow \pi^*$ |
| <b>N3</b>  | $S_0 \rightarrow S_1$ | 777.0                 | 1.596            | 0.558               | H $\rightarrow$ L (0.973)    | $\pi \rightarrow \pi^*$ |
| <b>N4</b>  | $S_0 \rightarrow S_1$ | 581.4                 | 2.133            | 0.993               | H $\rightarrow$ L (0.973)    | $\pi \rightarrow \pi^*$ |
| <b>N5</b>  | $S_0 \rightarrow S_1$ | 972.5                 | 1.275            | 0.022               | H $\rightarrow$ L (0.972)    | $\pi \rightarrow \pi^*$ |
| <b>N6</b>  | $S_0 \rightarrow S_1$ | 614.3                 | 2.018            | 0.581               | H $\rightarrow$ L (0.978)    | $\pi \rightarrow \pi^*$ |
| <b>N7</b>  | $S_0 \rightarrow S_1$ | 747.9                 | 1.658            | 0.017               | H $\rightarrow$ L (0.888)    | $\pi \rightarrow \pi^*$ |
| <b>N8</b>  | $S_0 \rightarrow S_1$ | 772.8                 | 1.604            | 0.403               | H $\rightarrow$ L (0.949)    | $\pi \rightarrow \pi^*$ |
| <b>N9</b>  | $S_0 \rightarrow S_1$ | 1047.0                | 1.184            | 0.205               | H $\rightarrow$ L (0.968)    | $\pi \rightarrow \pi^*$ |
| <b>N10</b> | $S_0 \rightarrow S_1$ | 744.6                 | 1.665            | 0.450               | H $\rightarrow$ L (0.959)    | $\pi \rightarrow \pi^*$ |
| <b>N11</b> | $S_0 \rightarrow S_1$ | 1045.7                | 1.186            | 0.436               | H $\rightarrow$ L (0.961)    | $\pi \rightarrow \pi^*$ |
| <b>N12</b> | $S_0 \rightarrow S_1$ | 868.7                 | 1.427            | 0.070               | H $\rightarrow$ L (0.640)    | $\pi \rightarrow \pi^*$ |
| <b>N13</b> | $S_0 \rightarrow S_1$ | 833.6                 | 1.487            | 0.300               | H $\rightarrow$ L (0.982)    | $\pi \rightarrow \pi^*$ |

Table S23: Excited state properties calculated with the BH&amp;HLYP functional.

| Compound   | Electronic transition | $\lambda_{\max}$ (nm) | Optical gap (eV) | Oscillator strength | MO designation (coefficient) | Nature                  |
|------------|-----------------------|-----------------------|------------------|---------------------|------------------------------|-------------------------|
| <b>N1</b>  | $S_0 \rightarrow S_1$ | 499.2                 | 2.483            | 1.569               | H→L (0.758)                  | $\pi \rightarrow \pi^*$ |
| <b>N2</b>  | $S_0 \rightarrow S_1$ | 500.9                 | 2.475            | 2.618               | H→L (0.572)                  | $\pi \rightarrow \pi^*$ |
| <b>N3</b>  | $S_0 \rightarrow S_1$ | 478.0                 | 2.594            | 1.256               | H→L (0.784)                  | $\pi \rightarrow \pi^*$ |
| <b>N4</b>  | $S_0 \rightarrow S_1$ | 435.6                 | 2.846            | 1.568               | H→L (0.773)                  | $\pi \rightarrow \pi^*$ |
| <b>N5</b>  | $S_0 \rightarrow S_1$ | 529.9                 | 2.340            | 0.129               | H→L (0.841)                  | $\pi \rightarrow \pi^*$ |
| <b>N6</b>  | $S_0 \rightarrow S_1$ | 466.2                 | 2.659            | 1.037               | H→L (0.861)                  | $\pi \rightarrow \pi^*$ |
| <b>N7</b>  | $S_0 \rightarrow S_1$ | 427.0                 | 2.903            | 1.816               | H-1→L (0.901)                | $\pi \rightarrow \pi^*$ |
| <b>N8</b>  | $S_0 \rightarrow S_1$ | 466.7                 | 2.656            | 1.135               | H→L (0.565)                  | $\pi \rightarrow \pi^*$ |
| <b>N9</b>  | $S_0 \rightarrow S_1$ | 478.8                 | 2.590            | 1.257               | H→L (0.517)                  | $\pi \rightarrow \pi^*$ |
| <b>N10</b> | $S_0 \rightarrow S_1$ | 473.5                 | 2.619            | 1.035               | H→L (0.843)                  | $\pi \rightarrow \pi^*$ |
| <b>N11</b> | $S_0 \rightarrow S_1$ | 493.4                 | 2.513            | 1.822               | H-1→L (0.422)                | $\pi \rightarrow \pi^*$ |
| <b>N12</b> | $S_0 \rightarrow S_1$ | 441.6                 | 2.807            | 0.208               | H→L+1 (0.313)                | $\pi \rightarrow \pi^*$ |
| <b>N13</b> | $S_0 \rightarrow S_1$ | 489.5                 | 2.533            | 0.741               | H→L (0.877)                  | $\pi \rightarrow \pi^*$ |

Table S24: Excited state properties calculated with the TPSSh functional.

| Compound   | Electronic transition | $\lambda_{\max}$ (nm) | Optical gap (eV) | Oscillator strength | MO designation (coefficient) | Nature                  |
|------------|-----------------------|-----------------------|------------------|---------------------|------------------------------|-------------------------|
| <b>N1</b>  | $S_0 \rightarrow S_2$ | 563.2                 | 2.202            | 0.637               | H-1→L (0.788)                | $\pi \rightarrow \pi^*$ |
| <b>N2</b>  | $S_0 \rightarrow S_2$ | 864.5                 | 1.434            | 0.588               | H-1→L (0.933)                | $\pi \rightarrow \pi^*$ |
| <b>N3</b>  | $S_0 \rightarrow S_4$ | 494.6                 | 2.507            | 0.266               | H-2→L (0.759)                | $\pi \rightarrow \pi^*$ |
| <b>N4</b>  | $S_0 \rightarrow S_1$ | 782.3                 | 1.585            | 0.577               | H→L (0.964)                  | $\pi \rightarrow \pi^*$ |
| <b>N5</b>  | $S_0 \rightarrow S_4$ | 453.2                 | 2.736            | 1.026               | H-1→L (0.686)                | $\pi \rightarrow \pi^*$ |
| <b>N6</b>  | $S_0 \rightarrow S_2$ | 563.4                 | 2.201            | 0.534               | H-1→L (0.899)                | $\pi \rightarrow \pi^*$ |
| <b>N7</b>  | $S_0 \rightarrow S_4$ | 518.3                 | 2.392            | 1.234               | H-1→L (0.828)                | $\pi \rightarrow \pi^*$ |
| <b>N8</b>  | $S_0 \rightarrow S_3$ | 623.0                 | 1.990            | 0.554               | H-1→L (0.977)                | $\pi \rightarrow \pi^*$ |
| <b>N9</b>  | $S_0 \rightarrow S_2$ | 831.7                 | 1.491            | 0.497               | H-1→L (0.936)                | $\pi \rightarrow \pi^*$ |
| <b>N10</b> | $S_0 \rightarrow S_2$ | 1042.4                | 1.189            | 0.259               | H→L (0.655)                  | $\pi \rightarrow \pi^*$ |
| <b>N11</b> | $S_0 \rightarrow S_2$ | 1206.2                | 1.028            | 0.177               | H→L (0.978)                  | $\pi \rightarrow \pi^*$ |
| <b>N12</b> | $S_0 \rightarrow S_3$ | 790.5                 | 1.568            | 0.268               | H-1→L+1 (0.948)              | $\pi \rightarrow \pi^*$ |
| <b>N13</b> | $S_0 \rightarrow S_1$ | 1204.8                | 1.029            | 0.201               | H→L (0.986)                  | $\pi \rightarrow \pi^*$ |

Table S25: Excited state properties calculated with the TPSS0 functional.

| Compound   | Electronic transition | $\lambda_{\max}$ (nm) | Optical gap (eV) | Oscillator strength | MO designation (coefficient) | Nature                  |
|------------|-----------------------|-----------------------|------------------|---------------------|------------------------------|-------------------------|
| <b>N1</b>  | $S_0 \rightarrow S_1$ | 789.4                 | 1.571            | 0.697               | H→L (0.988)                  | $\pi \rightarrow \pi^*$ |
| <b>N2</b>  | $S_0 \rightarrow S_1$ | 784.0                 | 1.581            | 1.039               | H→L (0.940)                  | $\pi \rightarrow \pi^*$ |
| <b>N3</b>  | $S_0 \rightarrow S_1$ | 750.9                 | 1.651            | 0.582               | H→L (0.973)                  | $\pi \rightarrow \pi^*$ |
| <b>N4</b>  | $S_0 \rightarrow S_1$ | 567.8                 | 2.183            | 1.023               | H→L (0.972)                  | $\pi \rightarrow \pi^*$ |
| <b>N5</b>  | $S_0 \rightarrow S_3$ | 409.1                 | 3.031            | 1.526               | H-1→L (0.960)                | $\pi \rightarrow \pi^*$ |
| <b>N6</b>  | $S_0 \rightarrow S_1$ | 592.7                 | 2.092            | 0.612               | H→L (0.974)                  | $\pi \rightarrow \pi^*$ |
| <b>N7</b>  | $S_0 \rightarrow S_2$ | 468.0                 | 2.649            | 1.605               | H-1→L (0.962)                | $\pi \rightarrow \pi^*$ |
| <b>N8</b>  | $S_0 \rightarrow S_1$ | 745.6                 | 1.663            | 0.415               | H→L (0.949)                  | $\pi \rightarrow \pi^*$ |
| <b>N9</b>  | $S_0 \rightarrow S_1$ | 987.2                 | 1.256            | 0.220               | H→L (0.966)                  | $\pi \rightarrow \pi^*$ |
| <b>N10</b> | $S_0 \rightarrow S_1$ | 709.4                 | 1.748            | 0.491               | H→L (0.952)                  | $\pi \rightarrow \pi^*$ |
| <b>N11</b> | $S_0 \rightarrow S_1$ | 983.3                 | 1.261            | 0.476               | H→L (0.959)                  | $\pi \rightarrow \pi^*$ |
| <b>N12</b> | $S_0 \rightarrow S_1$ | 820.3                 | 1.512            | 0.074               | H→L (0.635)                  | $\pi \rightarrow \pi^*$ |
| <b>N13</b> | $S_0 \rightarrow S_1$ | 789.4                 | 1.571            | 0.324               | H→L (0.982)                  | $\pi \rightarrow \pi^*$ |

Table S26: Excited state properties calculated with the M06 functional.

| Compound   | Electronic transition | $\lambda_{\max}$ (nm) | Optical gap (eV) | Oscillator strength | MO designation (coefficient) | Nature                  |
|------------|-----------------------|-----------------------|------------------|---------------------|------------------------------|-------------------------|
| <b>N1</b>  | $S_0 \rightarrow S_1$ | 738.9                 | 1.678            | 0.761               | H→L (0.974)                  | $\pi \rightarrow \pi^*$ |
| <b>N2</b>  | $S_0 \rightarrow S_1$ | 716.9                 | 1.729            | 1.270               | H→L (0.884)                  | $\pi \rightarrow \pi^*$ |
| <b>N3</b>  | $S_0 \rightarrow S_1$ | 713.8                 | 1.737            | 0.610               | H→L (0.959)                  | $\pi \rightarrow \pi^*$ |
| <b>N4</b>  | $S_0 \rightarrow S_1$ | 555.4                 | 2.233            | 1.102               | H→L (0.954)                  | $\pi \rightarrow \pi^*$ |
| <b>N5</b>  | $S_0 \rightarrow S_2$ | 423.6                 | 2.927            | 1.294               | H-1→L (0.829)                | $\pi \rightarrow \pi^*$ |
| <b>N6</b>  | $S_0 \rightarrow S_1$ | 561.5                 | 2.208            | 0.746               | H→L (0.939)                  | $\pi \rightarrow \pi^*$ |
| <b>N7</b>  | $S_0 \rightarrow S_1$ | 478.4                 | 2.592            | 1.541               | H-1→L (0.934)                | $\pi \rightarrow \pi^*$ |
| <b>N8</b>  | $S_0 \rightarrow S_1$ | 682.1                 | 1.818            | 0.519               | H→L (0.904)                  | $\pi \rightarrow \pi^*$ |
| <b>N9</b>  | $S_0 \rightarrow S_1$ | 850.2                 | 1.458            | 0.319               | H→L (0.935)                  | $\pi \rightarrow \pi^*$ |
| <b>N10</b> | $S_0 \rightarrow S_1$ | 707.2                 | 1.753            | 0.462               | H→L (0.958)                  | $\pi \rightarrow \pi^*$ |
| <b>N11</b> | $S_0 \rightarrow S_1$ | 854.0                 | 1.452            | 0.631               | H→L (0.917)                  | $\pi \rightarrow \pi^*$ |
| <b>N12</b> | $S_0 \rightarrow S_1$ | 747.4                 | 1.659            | 0.075               | H→L (0.502)                  | $\pi \rightarrow \pi^*$ |
| <b>N13</b> | $S_0 \rightarrow S_1$ | 820.8                 | 1.510            | 0.338               | H→L (0.978)                  | $\pi \rightarrow \pi^*$ |



Table S27: Excited state properties calculated with the M06-2X functional.

| Compound   | Electronic transition | $\lambda_{\max}$ (nm) | Optical gap (eV) | Oscillator strength | MO designation (coefficient) | Nature                  |
|------------|-----------------------|-----------------------|------------------|---------------------|------------------------------|-------------------------|
| <b>N1</b>  | $S_0 \rightarrow S_1$ | 497.3                 | 2.493            | 1.528               | H→L (0.739)                  | $\pi \rightarrow \pi^*$ |
| <b>N2</b>  | $S_0 \rightarrow S_1$ | 490.7                 | 2.526            | 2.548               | H→L (0.517)                  | $\pi \rightarrow \pi^*$ |
| <b>N3</b>  | $S_0 \rightarrow S_1$ | 487.7                 | 2.542            | 1.192               | H→L (0.776)                  | $\pi \rightarrow \pi^*$ |
| <b>N4</b>  | $S_0 \rightarrow S_1$ | 454.6                 | 2.727            | 1.517               | H→L (0.792)                  | $\pi \rightarrow \pi^*$ |
| <b>N5</b>  | $S_0 \rightarrow S_1$ | 527.0                 | 2.353            | 0.137               | H→L (0.812)                  | $\pi \rightarrow \pi^*$ |
| <b>N6</b>  | $S_0 \rightarrow S_1$ | 469.5                 | 2.641            | 1.002               | H→L (0.790)                  | $\pi \rightarrow \pi^*$ |
| <b>N7</b>  | $S_0 \rightarrow S_1$ | 426.3                 | 2.908            | 1.773               | H-1→L (0.908)                | $\pi \rightarrow \pi^*$ |
| <b>N8</b>  | $S_0 \rightarrow S_1$ | 455.5                 | 2.722            | 1.197               | H→L (0.515)                  | $\pi \rightarrow \pi^*$ |
| <b>N9</b>  | $S_0 \rightarrow S_1$ | 477.4                 | 2.597            | 1.217               | H→L (0.469)                  | $\pi \rightarrow \pi^*$ |
| <b>N10</b> | $S_0 \rightarrow S_1$ | 486.1                 | 2.551            | 0.965               | H→L (0.840)                  | $\pi \rightarrow \pi^*$ |
| <b>N11</b> | $S_0 \rightarrow S_1$ | 501.0                 | 2.475            | 1.617               | H-1→L (0.465)                | $\pi \rightarrow \pi^*$ |
| <b>N12</b> | $S_0 \rightarrow S_1$ | 452.4                 | 2.741            | 0.153               | H-1→L+1 (0.314)              | $\pi \rightarrow \pi^*$ |
| <b>N13</b> | $S_0 \rightarrow S_1$ | 508.5                 | 2.438            | 0.669               | H→L (0.867)                  | $\pi \rightarrow \pi^*$ |

Table S28: Excited state properties calculated with the LC-BLYP functional.

| Compound   | Electronic transition | $\lambda_{\max}$ (nm) | Optical gap (eV) | Oscillator strength | MO designation (coefficient) | Nature                  |
|------------|-----------------------|-----------------------|------------------|---------------------|------------------------------|-------------------------|
| <b>N1</b>  | $S_0 \rightarrow S_1$ | 434.6                 | 2.853            | 1.762               | H→L (0.456)                  | $\pi \rightarrow \pi^*$ |
| <b>N2</b>  | $S_0 \rightarrow S_1$ | 439.4                 | 2.822            | 2.699               | H→L (0.305)                  | $\pi \rightarrow \pi^*$ |
| <b>N3</b>  | $S_0 \rightarrow S_1$ | 419.3                 | 2.957            | 1.481               | H→L (0.494)                  | $\pi \rightarrow \pi^*$ |
| <b>N4</b>  | $S_0 \rightarrow S_1$ | 417.3                 | 2.971            | 1.635               | H→L (0.626)                  | $\pi \rightarrow \pi^*$ |
| <b>N5</b>  | $S_0 \rightarrow S_1$ | 398.0                 | 3.115            | 0.885               | H-1→L (0.400)                | $\pi \rightarrow \pi^*$ |
| <b>N6</b>  | $S_0 \rightarrow S_1$ | 438.7                 | 2.826            | 1.063               | H→L (0.764)                  | $\pi \rightarrow \pi^*$ |
| <b>N7</b>  | $S_0 \rightarrow S_1$ | 402.7                 | 3.079            | 1.796               | H-1→L (0.774)                | $\pi \rightarrow \pi^*$ |
| <b>N8</b>  | $S_0 \rightarrow S_1$ | 404.6                 | 3.064            | 1.349               | H-1→L (0.441)                | $\pi \rightarrow \pi^*$ |
| <b>N9</b>  | $S_0 \rightarrow S_1$ | 423.5                 | 2.928            | 1.357               | H-1→L (0.399)                | $\pi \rightarrow \pi^*$ |
| <b>N10</b> | $S_0 \rightarrow S_1$ | 413.0                 | 3.002            | 1.302               | H→L (0.625)                  | $\pi \rightarrow \pi^*$ |
| <b>N11</b> | $S_0 \rightarrow S_1$ | 460.4                 | 2.693            | 1.435               | H→L (0.542)                  | $\pi \rightarrow \pi^*$ |
| <b>N12</b> | $S_0 \rightarrow S_1$ | 417.3                 | 2.971            | 0.140               | H-1→L+1 (0.422)              | $\pi \rightarrow \pi^*$ |
| <b>N13</b> | $S_0 \rightarrow S_1$ | 394.8                 | 3.140            | 1.098               | H→L (0.561)                  | $\pi \rightarrow \pi^*$ |

Table S29: Excited state properties calculated with the CAM-B3LYP functional.

| Compound   | Electronic transition | $\lambda_{\max}$ (nm) | Optical gap (eV) | Oscillator strength | MO designation (coefficient)  | Nature                  |
|------------|-----------------------|-----------------------|------------------|---------------------|-------------------------------|-------------------------|
| <b>N1</b>  | $S_0 \rightarrow S_1$ | 484.6                 | 2.559            | 1.621               | H $\rightarrow$ L (0.667)     | $\pi \rightarrow \pi^*$ |
| <b>N2</b>  | $S_0 \rightarrow S_1$ | 483.2                 | 2.566            | 2.655               | H $\rightarrow$ L (0.451)     | $\pi \rightarrow \pi^*$ |
| <b>N3</b>  | $S_0 \rightarrow S_1$ | 470.9                 | 2.633            | 1.268               | H $\rightarrow$ L (0.708)     | $\pi \rightarrow \pi^*$ |
| <b>N4</b>  | $S_0 \rightarrow S_1$ | 445.0                 | 2.786            | 1.551               | H $\rightarrow$ L (0.745)     | $\pi \rightarrow \pi^*$ |
| <b>N5</b>  | $S_0 \rightarrow S_1$ | 501.8                 | 2.471            | 0.182               | H $\rightarrow$ L (0.746)     | $\pi \rightarrow \pi^*$ |
| <b>N6</b>  | $S_0 \rightarrow S_1$ | 467.2                 | 2.654            | 1.010               | H $\rightarrow$ L (0.788)     | $\pi \rightarrow \pi^*$ |
| <b>N7</b>  | $S_0 \rightarrow S_1$ | 426.1                 | 2.910            | 1.786               | H-1 $\rightarrow$ L (0.886)   | $\pi \rightarrow \pi^*$ |
| <b>N8</b>  | $S_0 \rightarrow S_1$ | 453.0                 | 2.737            | 1.172               | H $\rightarrow$ L (0.437)     | $\pi \rightarrow \pi^*$ |
| <b>N9</b>  | $S_0 \rightarrow S_1$ | 466.6                 | 2.657            | 1.288               | H-1 $\rightarrow$ L (0.401)   | $\pi \rightarrow \pi^*$ |
| <b>N10</b> | $S_0 \rightarrow S_1$ | 467.6                 | 2.651            | 1.056               | H $\rightarrow$ L (0.798)     | $\pi \rightarrow \pi^*$ |
| <b>N11</b> | $S_0 \rightarrow S_1$ | 489.1                 | 2.535            | 1.654               | H-1 $\rightarrow$ L (0.497)   | $\pi \rightarrow \pi^*$ |
| <b>N12</b> | $S_0 \rightarrow S_1$ | 444.6                 | 2.789            | 0.148               | H-1 $\rightarrow$ L+1 (0.390) | $\pi \rightarrow \pi^*$ |
| <b>N13</b> | $S_0 \rightarrow S_1$ | 479.2                 | 2.587            | 0.783               | H $\rightarrow$ L (0.818)     | $\pi \rightarrow \pi^*$ |

Table S30: Excited state properties calculated with the  $\omega$ B97 functional.

| Compound   | Electronic transition | $\lambda_{\max}$ (nm) | Optical gap (eV) | Oscillator strength | MO designation (coefficient)  | Nature                  |
|------------|-----------------------|-----------------------|------------------|---------------------|-------------------------------|-------------------------|
| <b>N1</b>  | $S_0 \rightarrow S_1$ | 418.7                 | 2.961            | 1.796               | H $\rightarrow$ L (0.437)     | $\pi \rightarrow \pi^*$ |
| <b>N2</b>  | $S_0 \rightarrow S_1$ | 425.4                 | 2.914            | 2.741               | H $\rightarrow$ L (0.307)     | $\pi \rightarrow \pi^*$ |
| <b>N3</b>  | $S_0 \rightarrow S_1$ | 401.3                 | 3.089            | 1.567               | H $\rightarrow$ L (0.460)     | $\pi \rightarrow \pi^*$ |
| <b>N4</b>  | $S_0 \rightarrow S_1$ | 392.1                 | 3.162            | 1.735               | H $\rightarrow$ L (0.588)     | $\pi \rightarrow \pi^*$ |
| <b>N5</b>  | $S_0 \rightarrow S_1$ | 376.4                 | 3.294            | 1.252               | H-1 $\rightarrow$ L (0.604)   | $\pi \rightarrow \pi^*$ |
| <b>N6</b>  | $S_0 \rightarrow S_1$ | 422.3                 | 2.936            | 1.111               | H $\rightarrow$ L (0.798)     | $\pi \rightarrow \pi^*$ |
| <b>N7</b>  | $S_0 \rightarrow S_1$ | 389.9                 | 3.180            | 1.820               | H-1 $\rightarrow$ L (0.725)   | $\pi \rightarrow \pi^*$ |
| <b>N8</b>  | $S_0 \rightarrow S_1$ | 388.6                 | 3.191            | 1.414               | H-1 $\rightarrow$ L (0.455)   | $\pi \rightarrow \pi^*$ |
| <b>N9</b>  | $S_0 \rightarrow S_1$ | 408.6                 | 3.034            | 1.378               | H-1 $\rightarrow$ L (0.366)   | $\pi \rightarrow \pi^*$ |
| <b>N10</b> | $S_0 \rightarrow S_1$ | 393.8                 | 3.148            | 1.409               | H $\rightarrow$ L (0.593)     | $\pi \rightarrow \pi^*$ |
| <b>N11</b> | $S_0 \rightarrow S_1$ | 443.9                 | 2.793            | 1.507               | H-1 $\rightarrow$ L (0.529)   | $\pi \rightarrow \pi^*$ |
| <b>N12</b> | $S_0 \rightarrow S_1$ | 394.1                 | 3.146            | 0.208               | H-1 $\rightarrow$ L+1 (0.313) | $\pi \rightarrow \pi^*$ |
| <b>N13</b> | $S_0 \rightarrow S_1$ | 366.9                 | 3.379            | 1.341               | H $\rightarrow$ L (0.519)     | $\pi \rightarrow \pi^*$ |

Table S31: Excited state properties calculated with the  $\omega$ B97X functional.

| Compound   | Electronic transition | $\lambda_{\max}$ (nm) | Optical gap (eV) | Oscillator strength | MO designation (coefficient)  | Nature                  |
|------------|-----------------------|-----------------------|------------------|---------------------|-------------------------------|-------------------------|
| <b>N1</b>  | $S_0 \rightarrow S_1$ | 429.1                 | 2.889            | 1.792               | H $\rightarrow$ L (0.465)     | $\pi \rightarrow \pi^*$ |
| <b>N2</b>  | $S_0 \rightarrow S_1$ | 436.2                 | 2.842            | 2.758               | H $\rightarrow$ L (0.324)     | $\pi \rightarrow \pi^*$ |
| <b>N3</b>  | $S_0 \rightarrow S_1$ | 412.3                 | 3.007            | 1.526               | H $\rightarrow$ L (0.493)     | $\pi \rightarrow \pi^*$ |
| <b>N4</b>  | $S_0 \rightarrow S_1$ | 404.6                 | 3.065            | 1.690               | H $\rightarrow$ L (0.612)     | $\pi \rightarrow \pi^*$ |
| <b>N5</b>  | $S_0 \rightarrow S_1$ | 388.7                 | 3.189            | 1.056               | H-1 $\rightarrow$ L (0.489)   | $\pi \rightarrow \pi^*$ |
| <b>N6</b>  | $S_0 \rightarrow S_1$ | 432.9                 | 2.864            | 1.083               | H $\rightarrow$ L (0.793)     | $\pi \rightarrow \pi^*$ |
| <b>N7</b>  | $S_0 \rightarrow S_1$ | 398.4                 | 3.112            | 1.825               | H-1 $\rightarrow$ L (0.749)   | $\pi \rightarrow \pi^*$ |
| <b>N8</b>  | $S_0 \rightarrow S_1$ | 401.2                 | 3.090            | 1.356               | H-1 $\rightarrow$ L (0.441)   | $\pi \rightarrow \pi^*$ |
| <b>N9</b>  | $S_0 \rightarrow S_1$ | 419.6                 | 2.955            | 1.357               | H-1 $\rightarrow$ L (0.377)   | $\pi \rightarrow \pi^*$ |
| <b>N10</b> | $S_0 \rightarrow S_1$ | 404.7                 | 3.064            | 1.356               | H $\rightarrow$ L (0.625)     | $\pi \rightarrow \pi^*$ |
| <b>N11</b> | $S_0 \rightarrow S_1$ | 453.0                 | 2.737            | 1.520               | H-1 $\rightarrow$ L (0.530)   | $\pi \rightarrow \pi^*$ |
| <b>N12</b> | $S_0 \rightarrow S_1$ | 405.4                 | 3.058            | 0.174               | H-1 $\rightarrow$ L+1 (0.378) | $\pi \rightarrow \pi^*$ |
| <b>N13</b> | $S_0 \rightarrow S_1$ | 384.1                 | 3.228            | 1.211               | H $\rightarrow$ L (0.566)     | $\pi \rightarrow \pi^*$ |

Table S32: Excited state properties calculated with the  $\omega$ B97X-D3 functional.

| Compound   | Electronic transition | $\lambda_{\max}$ (nm) | Optical gap (eV) | Oscillator strength | MO designation (coefficient)  | Nature                  |
|------------|-----------------------|-----------------------|------------------|---------------------|-------------------------------|-------------------------|
| <b>N1</b>  | $S_0 \rightarrow S_1$ | 438.4                 | 2.828            | 1.790               | H $\rightarrow$ L (0.493)     | $\pi \rightarrow \pi^*$ |
| <b>N2</b>  | $S_0 \rightarrow S_1$ | 445.6                 | 2.782            | 2.776               | H $\rightarrow$ L (0.339)     | $\pi \rightarrow \pi^*$ |
| <b>N3</b>  | $S_0 \rightarrow S_1$ | 423.0                 | 2.931            | 1.480               | H $\rightarrow$ L (0.526)     | $\pi \rightarrow \pi^*$ |
| <b>N4</b>  | $S_0 \rightarrow S_1$ | 415.2                 | 2.986            | 1.655               | H $\rightarrow$ L (0.635)     | $\pi \rightarrow \pi^*$ |
| <b>N5</b>  | $S_0 \rightarrow S_1$ | 404.6                 | 3.064            | 0.806               | H $\rightarrow$ L (0.412)     | $\pi \rightarrow \pi^*$ |
| <b>N6</b>  | $S_0 \rightarrow S_1$ | 441.8                 | 2.806            | 1.058               | H $\rightarrow$ L (0.781)     | $\pi \rightarrow \pi^*$ |
| <b>N7</b>  | $S_0 \rightarrow S_1$ | 405.5                 | 3.058            | 1.830               | H-1 $\rightarrow$ L (0.794)   | $\pi \rightarrow \pi^*$ |
| <b>N8</b>  | $S_0 \rightarrow S_1$ | 412.9                 | 3.003            | 1.305               | H-1 $\rightarrow$ L (0.432)   | $\pi \rightarrow \pi^*$ |
| <b>N9</b>  | $S_0 \rightarrow S_1$ | 429.7                 | 2.885            | 1.340               | H-1 $\rightarrow$ L (0.396)   | $\pi \rightarrow \pi^*$ |
| <b>N10</b> | $S_0 \rightarrow S_1$ | 415.6                 | 2.983            | 1.302               | H $\rightarrow$ L (0.656)     | $\pi \rightarrow \pi^*$ |
| <b>N11</b> | $S_0 \rightarrow S_1$ | 461.3                 | 2.688            | 1.532               | H-1 $\rightarrow$ L (0.534)   | $\pi \rightarrow \pi^*$ |
| <b>N12</b> | $S_0 \rightarrow S_1$ | 415.5                 | 2.984            | 0.155               | H-1 $\rightarrow$ L+1 (0.413) | $\pi \rightarrow \pi^*$ |
| <b>N13</b> | $S_0 \rightarrow S_1$ | 401.8                 | 3.086            | 1.107               | H $\rightarrow$ L (0.613)     | $\pi \rightarrow \pi^*$ |

Table S33: Excited state properties calculated with the  $\omega$ B97X-D3(BJ) functional.

| Compound   | Electronic transition | $\lambda_{\max}$ (nm) | Optical gap (eV) | Oscillator strength | MO designation (coefficient)  | Nature                  |
|------------|-----------------------|-----------------------|------------------|---------------------|-------------------------------|-------------------------|
| <b>N1</b>  | $S_0 \rightarrow S_1$ | 426.4                 | 2.908            | 1.803               | H $\rightarrow$ L (0.470)     | $\pi \rightarrow \pi^*$ |
| <b>N2</b>  | $S_0 \rightarrow S_1$ | 433.5                 | 2.860            | 2.782               | H $\rightarrow$ L (0.332)     | $\pi \rightarrow \pi^*$ |
| <b>N3</b>  | $S_0 \rightarrow S_1$ | 408.8                 | 3.033            | 1.542               | H $\rightarrow$ L (0.497)     | $\pi \rightarrow \pi^*$ |
| <b>N4</b>  | $S_0 \rightarrow S_1$ | 400.8                 | 3.093            | 1.699               | H $\rightarrow$ L (0.615)     | $\pi \rightarrow \pi^*$ |
| <b>N5</b>  | $S_0 \rightarrow S_1$ | 385.4                 | 3.217            | 1.076               | H-1 $\rightarrow$ L (0.494)   | $\pi \rightarrow \pi^*$ |
| <b>N6</b>  | $S_0 \rightarrow S_1$ | 429.7                 | 2.885            | 1.089               | H $\rightarrow$ L (0.803)     | $\pi \rightarrow \pi^*$ |
| <b>N7</b>  | $S_0 \rightarrow S_1$ | 395.7                 | 3.133            | 1.837               | H-1 $\rightarrow$ L (0.693)   | $\pi \rightarrow \pi^*$ |
| <b>N8</b>  | $S_0 \rightarrow S_1$ | 398.9                 | 3.108            | 1.360               | H-1 $\rightarrow$ L (0.434)   | $\pi \rightarrow \pi^*$ |
| <b>N9</b>  | $S_0 \rightarrow S_1$ | 416.6                 | 2.976            | 1.362               | H-1 $\rightarrow$ L (0.370)   | $\pi \rightarrow \pi^*$ |
| <b>N10</b> | $S_0 \rightarrow S_1$ | 401.6                 | 3.087            | 1.370               | H $\rightarrow$ L (0.630)     | $\pi \rightarrow \pi^*$ |
| <b>N11</b> | $S_0 \rightarrow S_1$ | 449.0                 | 2.761            | 1.545               | H-1 $\rightarrow$ L (0.524)   | $\pi \rightarrow \pi^*$ |
| <b>N12</b> | $S_0 \rightarrow S_1$ | 401.5                 | 3.088            | 0.178               | H-1 $\rightarrow$ L+1 (0.381) | $\pi \rightarrow \pi^*$ |
| <b>N13</b> | $S_0 \rightarrow S_1$ | 381.2                 | 3.253            | 1.226               | H $\rightarrow$ L (0.573)     | $\pi \rightarrow \pi^*$ |

Table S34: Excited state properties calculated with the  $\omega$ B97X-V functional.

| Compound   | Electronic transition | $\lambda_{\max}$ (nm) | Optical gap (eV) | Oscillator strength | MO designation (coefficient)  | Nature                  |
|------------|-----------------------|-----------------------|------------------|---------------------|-------------------------------|-------------------------|
| <b>N1</b>  | $S_0 \rightarrow S_1$ | 426.3                 | 2.908            | 1.803               | H $\rightarrow$ L (0.470)     | $\pi \rightarrow \pi^*$ |
| <b>N2</b>  | $S_0 \rightarrow S_1$ | 433.5                 | 2.860            | 2.782               | H $\rightarrow$ L (0.332)     | $\pi \rightarrow \pi^*$ |
| <b>N3</b>  | $S_0 \rightarrow S_1$ | 408.8                 | 3.033            | 1.542               | H $\rightarrow$ L (0.497)     | $\pi \rightarrow \pi^*$ |
| <b>N4</b>  | $S_0 \rightarrow S_1$ | 400.8                 | 3.093            | 1.699               | H $\rightarrow$ L (0.615)     | $\pi \rightarrow \pi^*$ |
| <b>N5</b>  | $S_0 \rightarrow S_1$ | 385.4                 | 3.217            | 1.076               | H-1 $\rightarrow$ L (0.494)   | $\pi \rightarrow \pi^*$ |
| <b>N6</b>  | $S_0 \rightarrow S_1$ | 429.7                 | 2.885            | 1.089               | H $\rightarrow$ L (0.803)     | $\pi \rightarrow \pi^*$ |
| <b>N7</b>  | $S_0 \rightarrow S_1$ | 395.7                 | 3.133            | 1.837               | H-1 $\rightarrow$ L (0.693)   | $\pi \rightarrow \pi^*$ |
| <b>N8</b>  | $S_0 \rightarrow S_1$ | 398.9                 | 3.108            | 1.360               | H-1 $\rightarrow$ L (0.434)   | $\pi \rightarrow \pi^*$ |
| <b>N9</b>  | $S_0 \rightarrow S_1$ | 416.6                 | 2.976            | 1.362               | H $\rightarrow$ L (0.370)     | $\pi \rightarrow \pi^*$ |
| <b>N10</b> | $S_0 \rightarrow S_1$ | 401.6                 | 3.087            | 1.370               | H $\rightarrow$ L (0.630)     | $\pi \rightarrow \pi^*$ |
| <b>N11</b> | $S_0 \rightarrow S_1$ | 449.0                 | 2.761            | 1.545               | H-1 $\rightarrow$ L (0.524)   | $\pi \rightarrow \pi^*$ |
| <b>N12</b> | $S_0 \rightarrow S_1$ | 401.5                 | 3.088            | 0.178               | H-1 $\rightarrow$ L+1 (0.381) | $\pi \rightarrow \pi^*$ |
| <b>N13</b> | $S_0 \rightarrow S_1$ | 381.2                 | 3.253            | 1.226               | H $\rightarrow$ L (0.573)     | $\pi \rightarrow \pi^*$ |

Table S35: Excited state properties calculated with the B2PLYP functional.

| Compound   | Electronic transition | $\lambda_{\max}$ (nm) | Optical gap (eV) | Oscillator strength | MO designation (coefficient) | Nature                  |
|------------|-----------------------|-----------------------|------------------|---------------------|------------------------------|-------------------------|
| <b>N1</b>  | $S_0 \rightarrow S_1$ | 565.7                 | 2.192            | 1.404               | H→L (0.722)                  | $\pi \rightarrow \pi^*$ |
| <b>N2</b>  | $S_0 \rightarrow S_1$ | 539.7                 | 2.297            | 2.449               | H→L (0.545)                  | $\pi \rightarrow \pi^*$ |
| <b>N3</b>  | $S_0 \rightarrow S_1$ | 562.3                 | 2.205            | 1.099               | H→L (0.749)                  | $\pi \rightarrow \pi^*$ |
| <b>N4</b>  | $S_0 \rightarrow S_1$ | 523.4                 | 2.369            | 1.314               | H→L (0.746)                  | $\pi \rightarrow \pi^*$ |
| <b>N5</b>  | $S_0 \rightarrow S_1$ | 713.0                 | 1.739            | 0.126               | H→L (0.808)                  | $\pi \rightarrow \pi^*$ |
| <b>N6</b>  | $S_0 \rightarrow S_1$ | 516.3                 | 2.401            | 0.941               | H→L (0.866)                  | $\pi \rightarrow \pi^*$ |
| <b>N7</b>  | $S_0 \rightarrow S_1$ | 452.0                 | 2.743            | 1.710               | H-1→L (0.879)                | $\pi \rightarrow \pi^*$ |
| <b>N8</b>  | $S_0 \rightarrow S_1$ | 509.8                 | 2.432            | 1.054               | H→L (0.537)                  | $\pi \rightarrow \pi^*$ |
| <b>N9</b>  | $S_0 \rightarrow S_1$ | 525.0                 | 2.362            | 1.157               | H→L (0.491)                  | $\pi \rightarrow \pi^*$ |
| <b>N10</b> | $S_0 \rightarrow S_1$ | 560.9                 | 2.210            | 0.906               | H→L (0.819)                  | $\pi \rightarrow \pi^*$ |
| <b>N11</b> | $S_0 \rightarrow S_1$ | 553.4                 | 2.240            | 1.626               | H-1→L (0.441)                | $\pi \rightarrow \pi^*$ |
| <b>N12</b> | $S_0 \rightarrow S_1$ | 542.1                 | 2.287            | 0.184               | H→L+1 (0.283)                | $\pi \rightarrow \pi^*$ |
| <b>N13</b> | $S_0 \rightarrow S_1$ | 650.5                 | 1.906            | 0.594               | H→L (0.850)                  | $\pi \rightarrow \pi^*$ |

Table S36: Excited state properties calculated with the B2GPPLYP functional.

| Compound   | Electronic transition | $\lambda_{\max}$ (nm) | Optical gap (eV) | Oscillator strength | MO designation (coefficient) | Nature                  |
|------------|-----------------------|-----------------------|------------------|---------------------|------------------------------|-------------------------|
| <b>N1</b>  | $S_0 \rightarrow S_1$ | 503.4                 | 2.463            | 1.596               | H→L (0.605)                  | $\pi \rightarrow \pi^*$ |
| <b>N2</b>  | $S_0 \rightarrow S_1$ | 494.2                 | 2.509            | 2.660               | H→L (0.468)                  | $\pi \rightarrow \pi^*$ |
| <b>N3</b>  | $S_0 \rightarrow S_1$ | 491.2                 | 2.524            | 1.324               | H→L (0.626)                  | $\pi \rightarrow \pi^*$ |
| <b>N4</b>  | $S_0 \rightarrow S_1$ | 483.2                 | 2.566            | 1.441               | H→L (0.651)                  | $\pi \rightarrow \pi^*$ |
| <b>N5</b>  | $S_0 \rightarrow S_1$ | 513.1                 | 2.416            | 0.576               | H→L (0.534)                  | $\pi \rightarrow \pi^*$ |
| <b>N6</b>  | $S_0 \rightarrow S_1$ | 491.4                 | 2.523            | 0.998               | H→L (0.873)                  | $\pi \rightarrow \pi^*$ |
| <b>N7</b>  | $S_0 \rightarrow S_1$ | 431.5                 | 2.874            | 1.758               | H→L (0.540)                  | $\pi \rightarrow \pi^*$ |
| <b>N8</b>  | $S_0 \rightarrow S_1$ | 459.9                 | 2.696            | 1.202               | H→L (0.464)                  | $\pi \rightarrow \pi^*$ |
| <b>N9</b>  | $S_0 \rightarrow S_1$ | 472.0                 | 2.627            | 1.274               | H→L (0.464)                  | $\pi \rightarrow \pi^*$ |
| <b>N10</b> | $S_0 \rightarrow S_1$ | 489.8                 | 2.531            | 1.132               | H→L (0.722)                  | $\pi \rightarrow \pi^*$ |
| <b>N11</b> | $S_0 \rightarrow S_1$ | 513.0                 | 2.417            | 1.732               | H-1→L (0.463)                | $\pi \rightarrow \pi^*$ |
| <b>N12</b> | $S_0 \rightarrow S_1$ | 497.9                 | 2.490            | 0.338               | H-1→L (0.334)                | $\pi \rightarrow \pi^*$ |
| <b>N13</b> | $S_0 \rightarrow S_1$ | 526.5                 | 2.355            | 0.908               | H→L (0.726)                  | $\pi \rightarrow \pi^*$ |

Table S37: Excited state properties calculated with the mPW2PLYP functional.

| Compound   | Electronic transition | $\lambda_{\max}$ (nm) | Optical gap (eV) | Oscillator strength | MO designation (coefficient) | Nature                  |
|------------|-----------------------|-----------------------|------------------|---------------------|------------------------------|-------------------------|
| <b>N1</b>  | $S_0 \rightarrow S_1$ | 542.5                 | 2.285            | 1.472               | H→L (0.701)                  | $\pi \rightarrow \pi^*$ |
| <b>N2</b>  | $S_0 \rightarrow S_1$ | 524.9                 | 2.362            | 2.520               | H→L (0.529)                  | $\pi \rightarrow \pi^*$ |
| <b>N3</b>  | $S_0 \rightarrow S_1$ | 534.7                 | 2.319            | 1.170               | H→L (0.727)                  | $\pi \rightarrow \pi^*$ |
| <b>N4</b>  | $S_0 \rightarrow S_1$ | 502.4                 | 2.468            | 1.373               | H→L (0.730)                  | $\pi \rightarrow \pi^*$ |
| <b>N5</b>  | $S_0 \rightarrow S_1$ | 649.0                 | 1.910            | 0.164               | H→L (0.781)                  | $\pi \rightarrow \pi^*$ |
| <b>N6</b>  | $S_0 \rightarrow S_1$ | 504.8                 | 2.456            | 0.964               | H→L (0.868)                  | $\pi \rightarrow \pi^*$ |
| <b>N7</b>  | $S_0 \rightarrow S_1$ | 444.9                 | 2.787            | 1.732               | H-1→L (0.858)                | $\pi \rightarrow \pi^*$ |
| <b>N8</b>  | $S_0 \rightarrow S_1$ | 493.4                 | 2.513            | 1.097               | H→L (0.521)                  | $\pi \rightarrow \pi^*$ |
| <b>N9</b>  | $S_0 \rightarrow S_1$ | 506.9                 | 2.446            | 1.200               | H→L (0.483)                  | $\pi \rightarrow \pi^*$ |
| <b>N10</b> | $S_0 \rightarrow S_1$ | 532.9                 | 2.327            | 0.971               | H→L (0.803)                  | $\pi \rightarrow \pi^*$ |
| <b>N11</b> | $S_0 \rightarrow S_1$ | 536.0                 | 2.313            | 1.676               | H-1→L (0.449)                | $\pi \rightarrow \pi^*$ |
| <b>N12</b> | $S_0 \rightarrow S_1$ | 518.0                 | 2.393            | 0.204               | H→L+1 (0.264)                | $\pi \rightarrow \pi^*$ |
| <b>N13</b> | $S_0 \rightarrow S_1$ | 599.8                 | 2.067            | 0.667               | H→L (0.832)                  | $\pi \rightarrow \pi^*$ |

Table S38: Excited state properties calculated with the DSD-BLYP functional.

| Compound   | Electronic transition | $\lambda_{\max}$ (nm) | Optical gap (eV) | Oscillator strength | MO designation (coefficient) | Nature                  |
|------------|-----------------------|-----------------------|------------------|---------------------|------------------------------|-------------------------|
| <b>N1</b>  | $S_0 \rightarrow S_1$ | 532.3                 | 2.329            | 1.485               | H→L (0.537)                  | $\pi \rightarrow \pi^*$ |
| <b>N2</b>  | $S_0 \rightarrow S_1$ | 493.0                 | 2.515            | 2.613               | H→L (0.428)                  | $\pi \rightarrow \pi^*$ |
| <b>N3</b>  | $S_0 \rightarrow S_1$ | 541.2                 | 2.291            | 1.204               | H→L (0.551)                  | $\pi \rightarrow \pi^*$ |
| <b>N4</b>  | $S_0 \rightarrow S_1$ | 624.0                 | 1.987            | 1.115               | H→L (0.585)                  | $\pi \rightarrow \pi^*$ |
| <b>N5</b>  | $S_0 \rightarrow S_1$ | 495.6                 | 2.502            | 1.001               | H-1→L (0.624)                | $\pi \rightarrow \pi^*$ |
| <b>N6</b>  | $S_0 \rightarrow S_1$ | 546.5                 | 2.269            | 0.902               | H→L (0.871)                  | $\pi \rightarrow \pi^*$ |
| <b>N7</b>  | $S_0 \rightarrow S_1$ | 441.1                 | 2.811            | 1.685               | H→L (0.805)                  | $\pi \rightarrow \pi^*$ |
| <b>N8</b>  | $S_0 \rightarrow S_1$ | 463.6                 | 2.674            | 1.202               | H→L (0.433)                  | $\pi \rightarrow \pi^*$ |
| <b>N9</b>  | $S_0 \rightarrow S_1$ | 477.7                 | 2.595            | 1.227               | H→L (0.470)                  | $\pi \rightarrow \pi^*$ |
| <b>N10</b> | $S_0 \rightarrow S_1$ | 556.9                 | 2.226            | 1.025               | H→L (0.648)                  | $\pi \rightarrow \pi^*$ |
| <b>N11</b> | $S_0 \rightarrow S_1$ | 575.9                 | 2.153            | 1.531               | H-1→L (0.453)                | $\pi \rightarrow \pi^*$ |
| <b>N12</b> | $S_0 \rightarrow S_1$ | 617.3                 | 2.008            | 0.567               | H-1→L (0.478)                | $\pi \rightarrow \pi^*$ |
| <b>N13</b> | $S_0 \rightarrow S_1$ | 689.7                 | 1.798            | 0.791               | H→L (0.617)                  | $\pi \rightarrow \pi^*$ |

Table S39: Excited state properties calculated with the DSD-PBEP86 functional.

| Compound   | Electronic transition | $\lambda_{\max}$ (nm) | Optical gap (eV) | Oscillator strength | MO designation (coefficient) | Nature                  |
|------------|-----------------------|-----------------------|------------------|---------------------|------------------------------|-------------------------|
| <b>N1</b>  | $S_0 \rightarrow S_1$ | 556.8                 | 2.227            | 1.431               | H→L (0.558)                  | $\pi \rightarrow \pi^*$ |
| <b>N2</b>  | $S_0 \rightarrow S_1$ | 510.3                 | 2.430            | 2.546               | H→L (0.439)                  | $\pi \rightarrow \pi^*$ |
| <b>N3</b>  | $S_0 \rightarrow S_1$ | 576.1                 | 2.152            | 1.134               | H→L (0.575)                  | $\pi \rightarrow \pi^*$ |
| <b>N4</b>  | $S_0 \rightarrow S_1$ | 669.0                 | 1.853            | 1.045               | H→L (0.612)                  | $\pi \rightarrow \pi^*$ |
| <b>N5</b>  | $S_0 \rightarrow S_1$ | 564.0                 | 2.198            | 0.788               | H-1→L (0.530)                | $\pi \rightarrow \pi^*$ |
| <b>N6</b>  | $S_0 \rightarrow S_1$ | 565.1                 | 2.194            | 0.871               | H→L (0.870)                  | $\pi \rightarrow \pi^*$ |
| <b>N7</b>  | $S_0 \rightarrow S_1$ | 451.1                 | 2.749            | 1.661               | H→L (0.773)                  | $\pi \rightarrow \pi^*$ |
| <b>N8</b>  | $S_0 \rightarrow S_1$ | 482.6                 | 2.569            | 1.161               | H→L (0.437)                  | $\pi \rightarrow \pi^*$ |
| <b>N9</b>  | $S_0 \rightarrow S_1$ | 497.9                 | 2.490            | 1.187               | H→L (0.458)                  | $\pi \rightarrow \pi^*$ |
| <b>N10</b> | $S_0 \rightarrow S_1$ | 595.7                 | 2.081            | 0.952               | H→L (0.674)                  | $\pi \rightarrow \pi^*$ |
| <b>N11</b> | $S_0 \rightarrow S_1$ | 598.8                 | 2.070            | 1.468               | H-1→L (0.461)                | $\pi \rightarrow \pi^*$ |
| <b>N12</b> | $S_0 \rightarrow S_1$ | 708.5                 | 1.750            | 0.345               | H-1→L (0.424)                | $\pi \rightarrow \pi^*$ |
| <b>N13</b> | $S_0 \rightarrow S_1$ | 803.2                 | 1.544            | 0.652               | H→L (0.656)                  | $\pi \rightarrow \pi^*$ |

Table S40: Excited state properties calculated with the  $\omega$ B2PLYP functional.

| Compound   | Electronic transition | $\lambda_{\max}$ (nm) | Optical gap (eV) | Oscillator strength | MO designation (coefficient) | Nature                  |
|------------|-----------------------|-----------------------|------------------|---------------------|------------------------------|-------------------------|
| <b>N1</b>  | $S_0 \rightarrow S_1$ | 434.7                 | 2.852            | 1.747               | H→L (0.455)                  | $\pi \rightarrow \pi^*$ |
| <b>N2</b>  | $S_0 \rightarrow S_1$ | 437.7                 | 2.833            | 2.762               | H→L (0.354)                  | $\pi \rightarrow \pi^*$ |
| <b>N3</b>  | $S_0 \rightarrow S_1$ | 417.8                 | 2.968            | 1.525               | H→L (0.466)                  | $\pi \rightarrow \pi^*$ |
| <b>N4</b>  | $S_0 \rightarrow S_1$ | 415.0                 | 2.987            | 1.658               | H→L (0.553)                  | $\pi \rightarrow \pi^*$ |
| <b>N5</b>  | $S_0 \rightarrow S_1$ | 386.6                 | 3.207            | 1.384               | H-1→L (0.715)                | $\pi \rightarrow \pi^*$ |
| <b>N6</b>  | $S_0 \rightarrow S_1$ | 442.3                 | 2.803            | 1.093               | H→L (0.842)                  | $\pi \rightarrow \pi^*$ |
| <b>N7</b>  | $S_0 \rightarrow S_1$ | 399.0                 | 3.107            | 1.804               | H-1→L (0.767)                | $\pi \rightarrow \pi^*$ |
| <b>N8</b>  | $S_0 \rightarrow S_1$ | 399.9                 | 3.100            | 1.383               | H→L (0.400)                  | $\pi \rightarrow \pi^*$ |
| <b>N9</b>  | $S_0 \rightarrow S_1$ | 417.4                 | 2.970            | 1.353               | H→L (0.401)                  | $\pi \rightarrow \pi^*$ |
| <b>N10</b> | $S_0 \rightarrow S_1$ | 410.6                 | 3.020            | 1.385               | H→L (0.581)                  | $\pi \rightarrow \pi^*$ |
| <b>N11</b> | $S_0 \rightarrow S_1$ | 460.0                 | 2.695            | 1.694               | H-1→L (0.475)                | $\pi \rightarrow \pi^*$ |
| <b>N12</b> | $S_0 \rightarrow S_1$ | 418.4                 | 2.963            | 0.618               | H→L+1 (0.418)                | $\pi \rightarrow \pi^*$ |
| <b>N13</b> | $S_0 \rightarrow S_1$ | 392.6                 | 3.158            | 1.386               | H→L (0.505)                  | $\pi \rightarrow \pi^*$ |





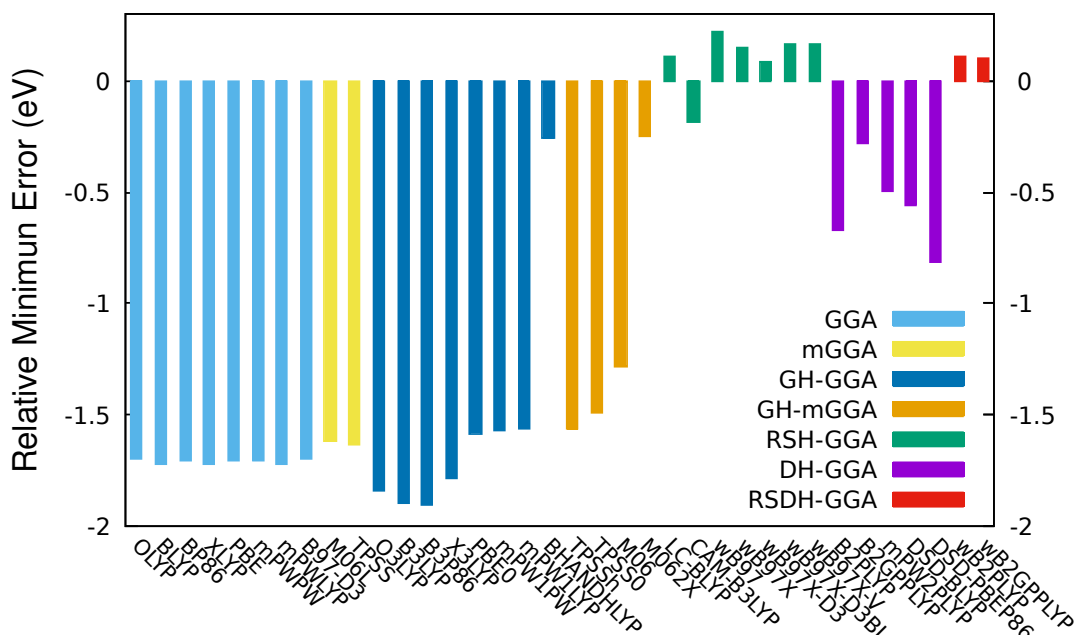

Figure S2: Relative minimum errors (Min) of TD-DFT excitation energies.

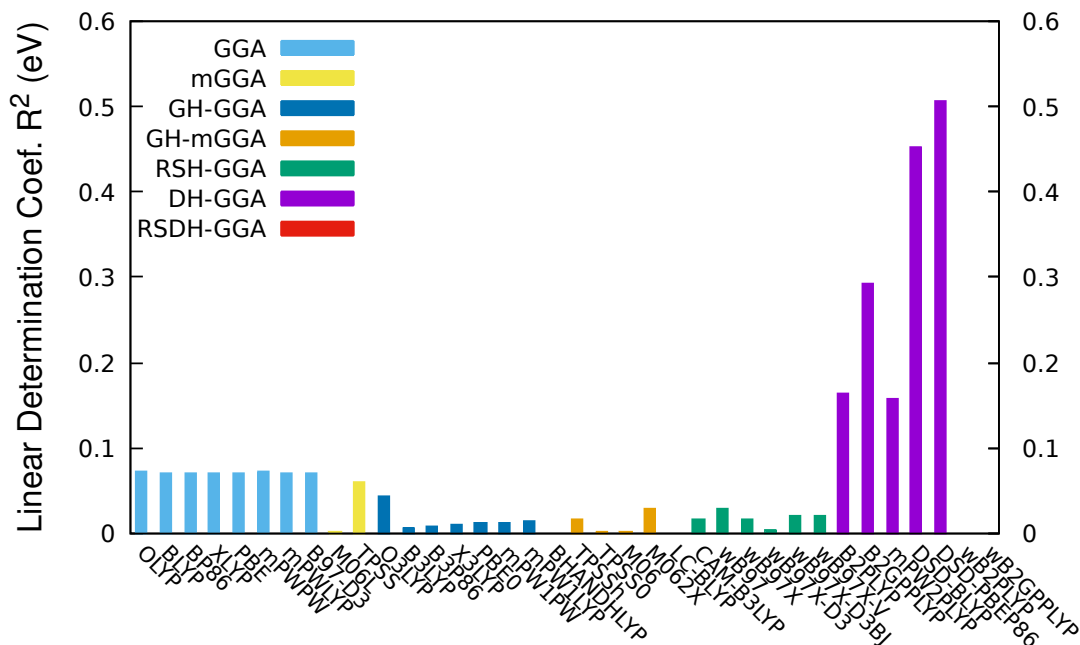

Figure S3: Linear determination coefficients ( $R^2$ ) of TD-DFT excitation energies.

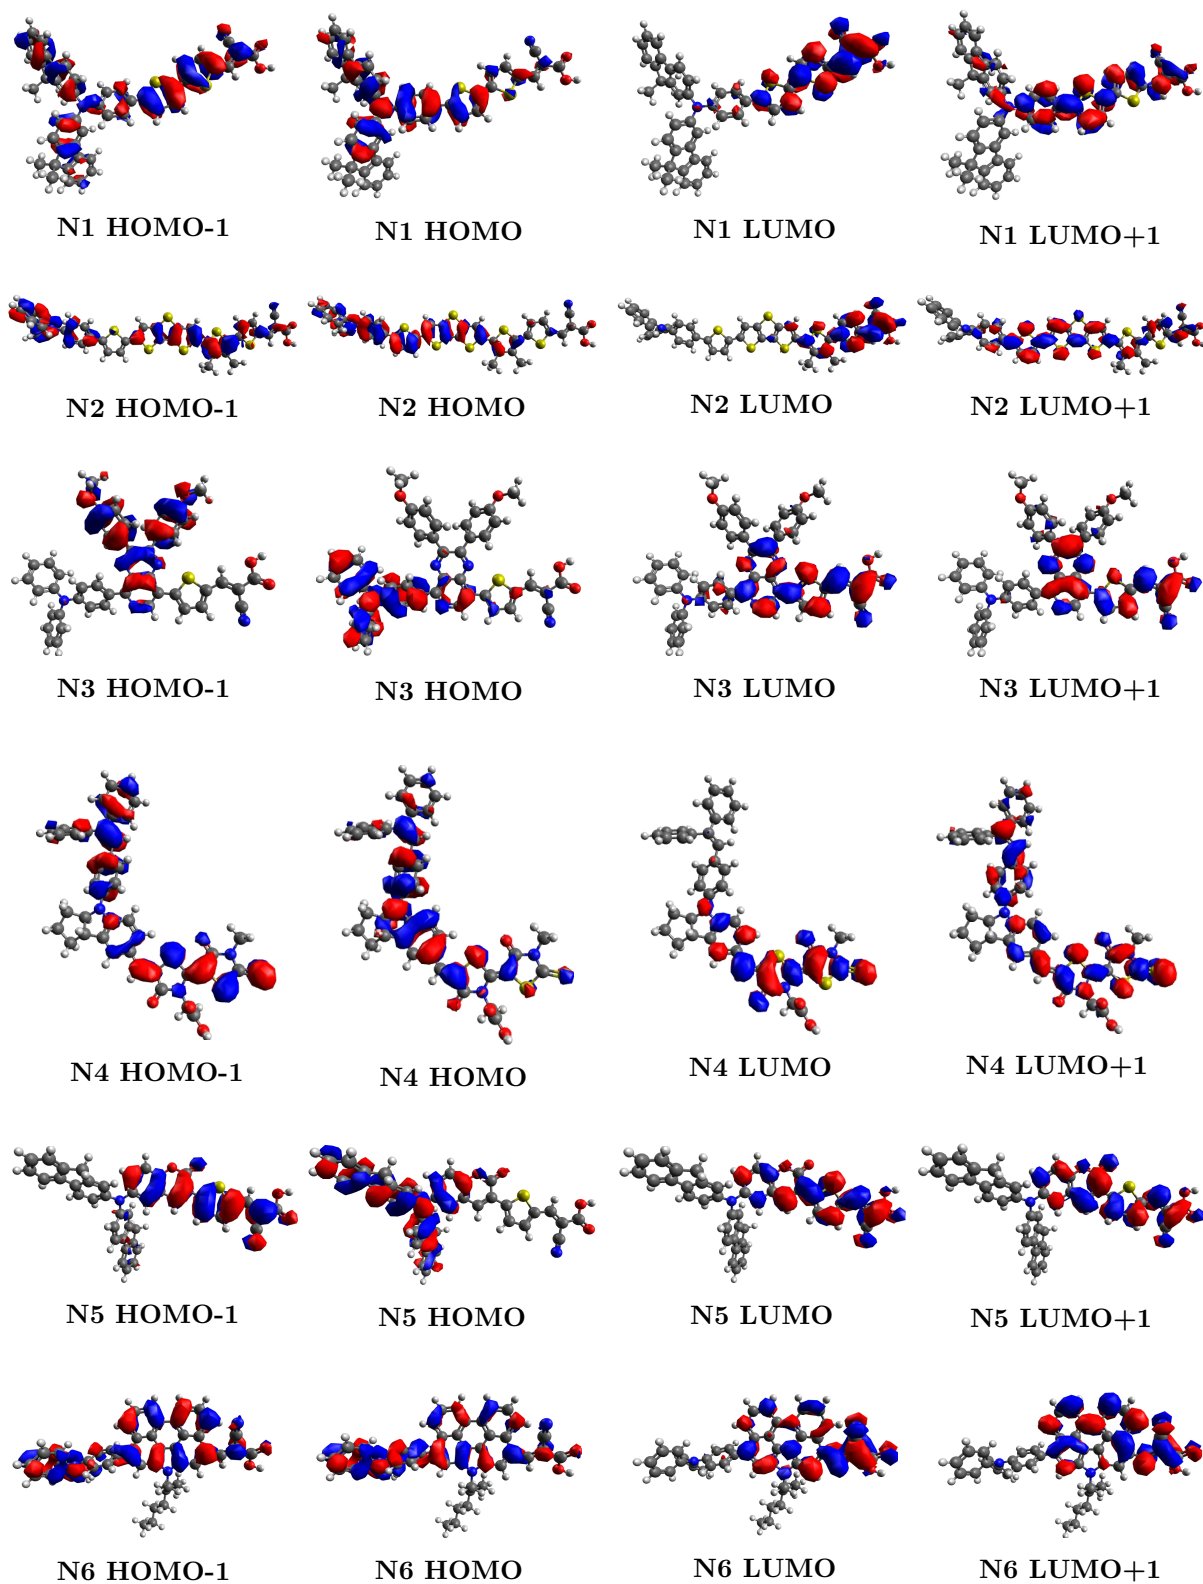

Figure S4: Molecular orbitals (HOMO-1, HOMO, LUOM and LUMO+1) involved in the main transitions of the dye sensitizers (N1–N13). Isosurface value = 0.02.

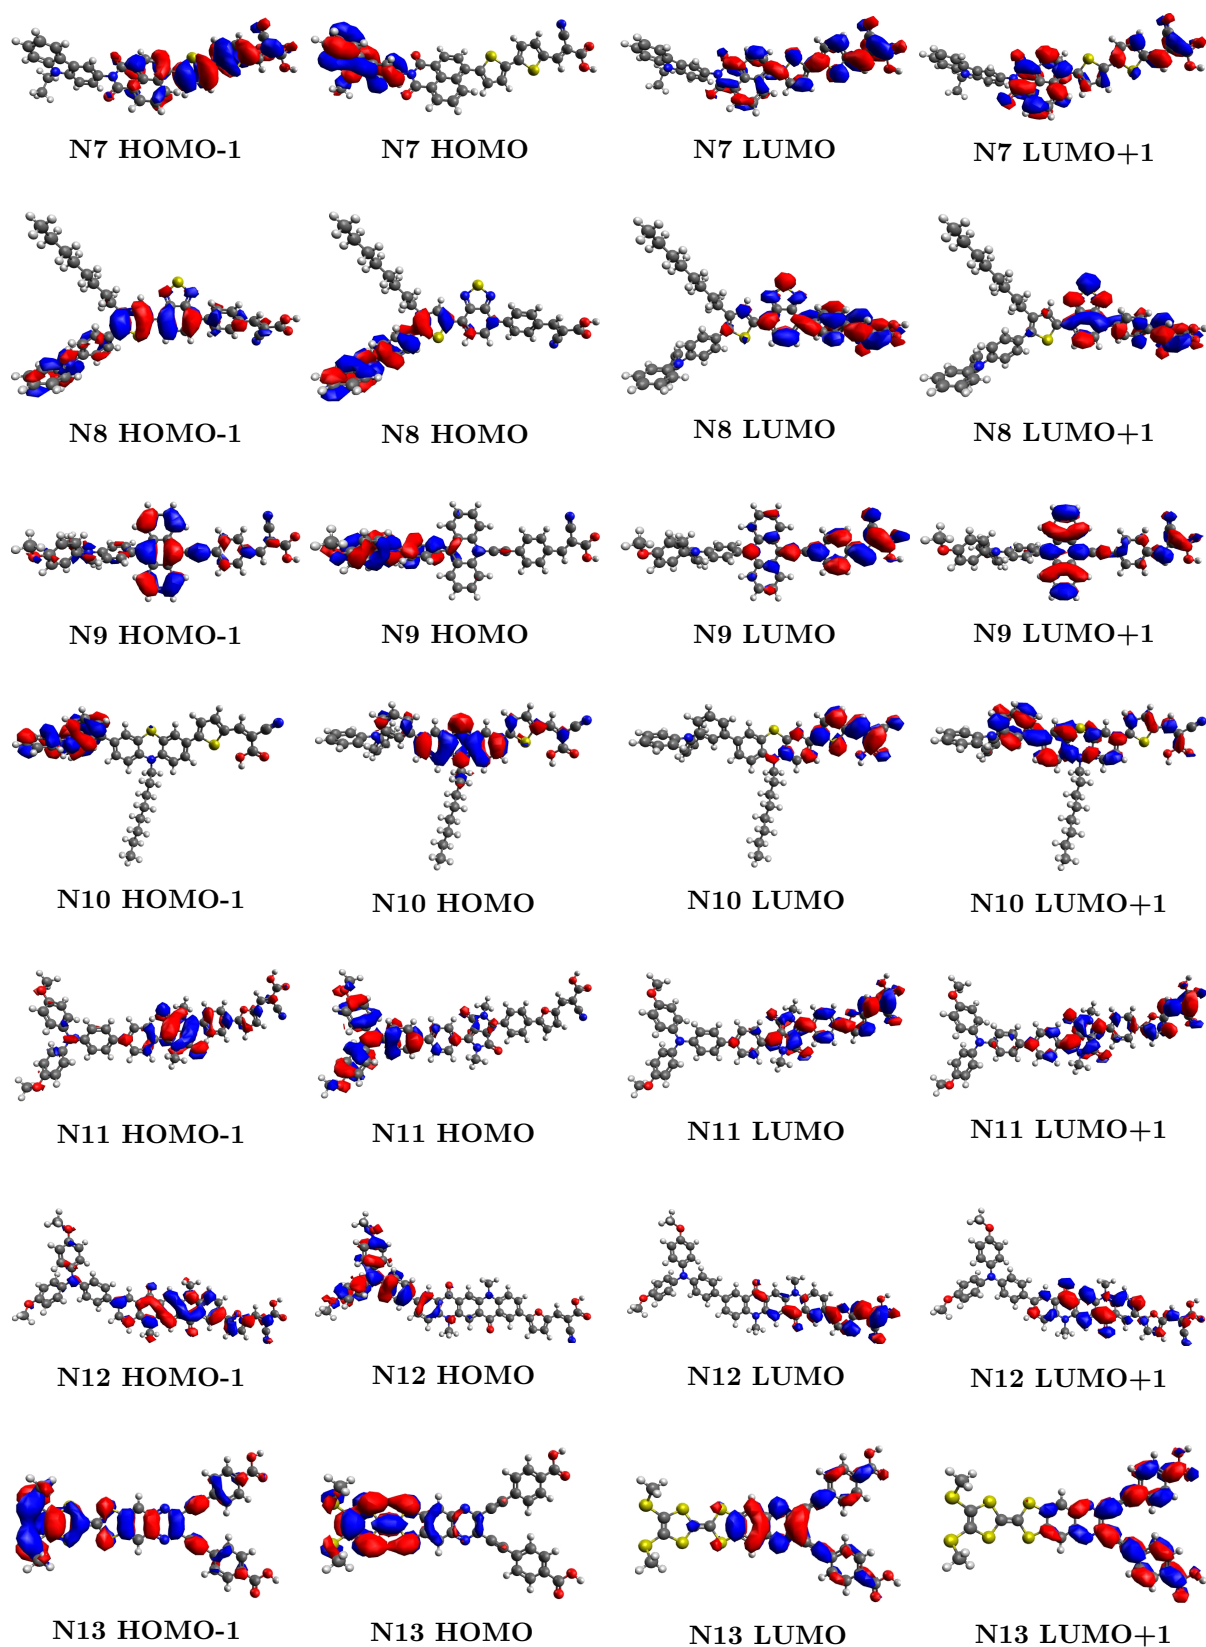

Figure S4: (*Cont.*) Molecular orbitals (HOMO-1, HOMO, LUMO and LUMO+1) involved in the main transitions of the dye sensitizers (N1–N13). Isosurface value = 0.02.
